# Supplementary material for: Impact of a poly(ethylene glycol) corona block on drug encapsulation during polymerization induced self-assembly
Source: Royal Society of Chemistry journal article supplement (doi:10.1039/d4sm00654b), 2024-01-01
Supplement: d4sm00654b1.pdf [file d4sm00654b1.pdf]

Supporting Information for

**Impact of a poly(ethylene glycol) corona block on drug encapsulation during polymerization induced self-assembly**

Guanrui Li, Cassie Duclos, and Ralm G. Ricarte

Department of Chemical and Biomedical Engineering, FAMU-FSU College of Engineering,  
Tallahassee, FL 32310

Email: [rricarte@eng.famu.fsu.edu](mailto:rricarte@eng.famu.fsu.edu)

**Table of Contents**

|                                                                                                                       |    |
|-----------------------------------------------------------------------------------------------------------------------|----|
| S1. Dynamic light scattering (DLS) plots.....                                                                         | 2  |
| S2. <sup>1</sup> H nuclear magnetic resonance (NMR) spectra.....                                                      | 4  |
| S3. <sup>1</sup> H NMR diffusion ordered spectroscopy (DOSY) spectra waterfall plots for PEG 10 and PEG-PHPMA 10..... | 15 |
| S4. <sup>1</sup> H NMR DOSY fit parameters for PEG solutions .....                                                    | 17 |
| S5. <sup>1</sup> H NMR DOSY plots and fit parameters for PEG-PHPMA PISA solutions.....                                | 19 |
| S6. <sup>1</sup> H NMR DOSY fit parameters for water .....                                                            | 20 |
| S7. PEG-PHPMA PISA solution viscosity adjustment .....                                                                | 20 |
| S8. PEG-PHPMA UV size-exclusion chromatography (SEC) trace deconvolution .....                                        | 21 |
| S9. PEG-PHPMA PISA kinetics .....                                                                                     | 23 |
| S11. Impact of initiator concentration on PEG-PHPMA PISA .....                                                        | 23 |
| S12. Impact of free PEG-OH chains on PEG-PHPMA PISA .....                                                             | 26 |
| S13. PEG 0 DLS hydrodynamic radius distribution.....                                                                  | 27 |
| S14. Eqn. 10 derivation.....                                                                                          | 28 |
| S15. Estimated hydrodynamic radii and diffusing species .....                                                         | 29 |
| S16. Transmission electron microscopy particle size distributions .....                                               | 29 |
| S17. References.....                                                                                                  | 30 |

## S1. Dynamic light scattering (DLS) plots

Figures S1 and S2 detail the DLS  $g_2$  autocorrelation functions and  $\Gamma$  vs.  $q^2$  plots, respectively, for PEG solutions.

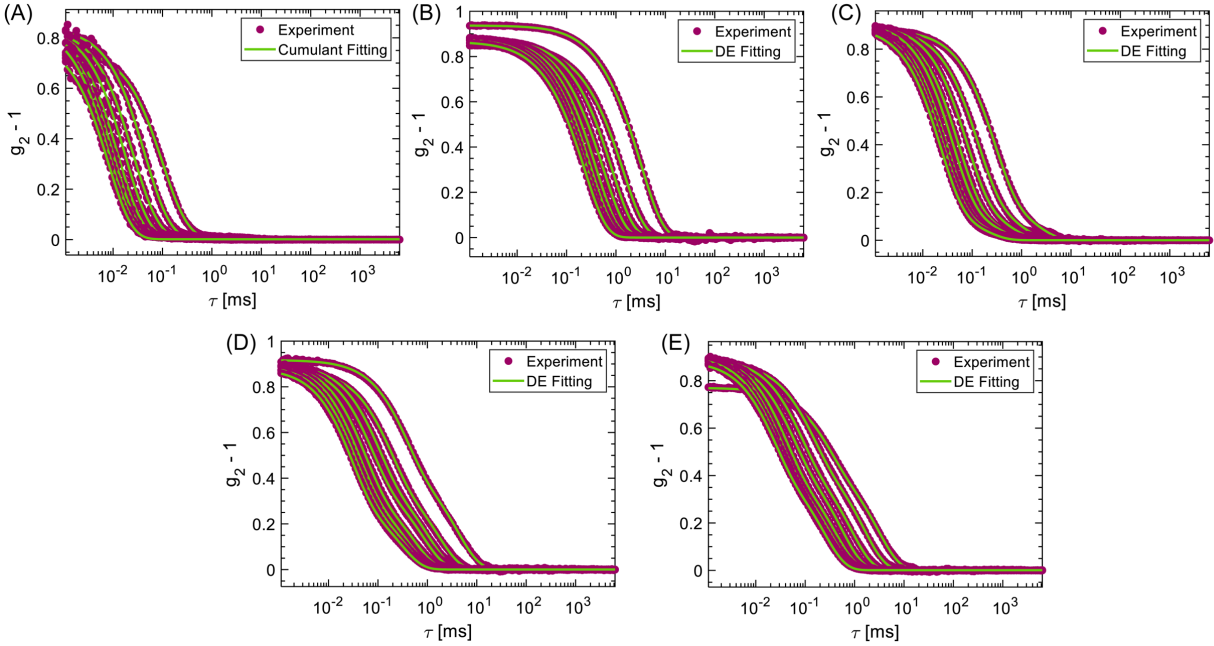

**Figure S1.** DLS  $g_2$  autocorrelation functions for (A) PEG-OH, (B) PEG 0, (C) PEG 10, (D), PEG 16, and (E) PEG 20. Eqn. 2 is fit to (A) data, and Eqn. 3 is fit to (B) to (E) data

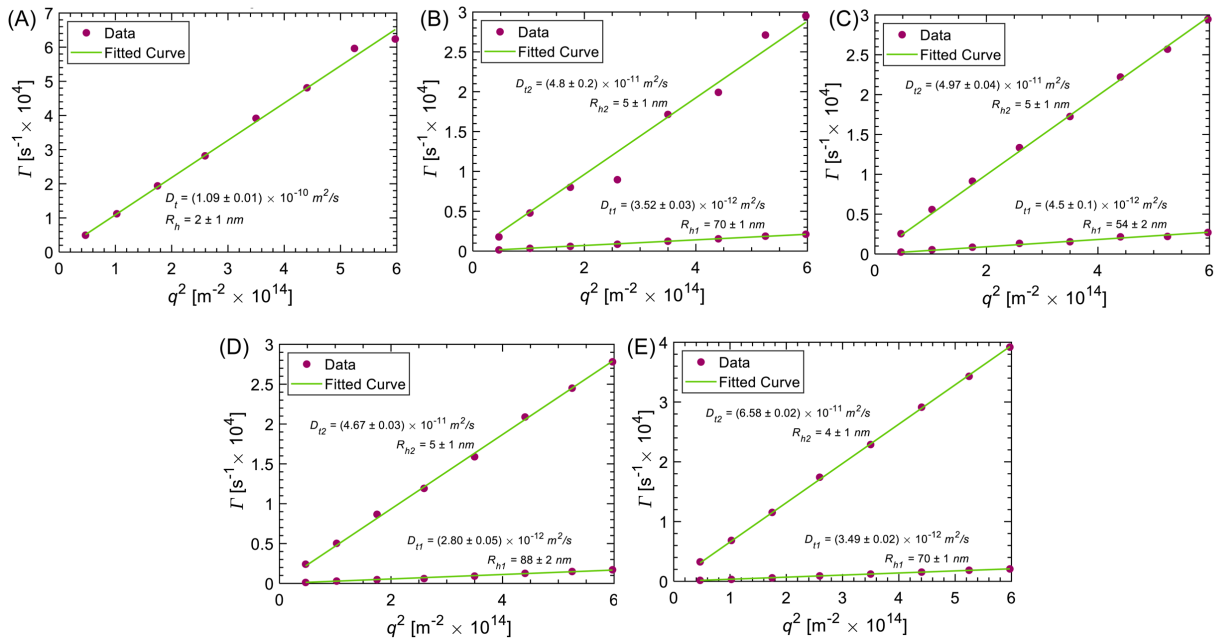

**Figure S2.** DLS  $\Gamma$  vs.  $q^2$  for (A) PEG-OH, (B) PEG 0, (C) PEG 10, (D), PEG 16, and (E) PEG 20. Eqn. 2 is fit to (A) data, and Eqn. 3 is fit to (B) to (E) data.

Figures S3 and S4 detail the DLS  $g_2$  autocorrelation functions and  $\Gamma$  vs.  $q^2$  plots, respectively, for the diluted PEG-PHPMA PISA solutions.

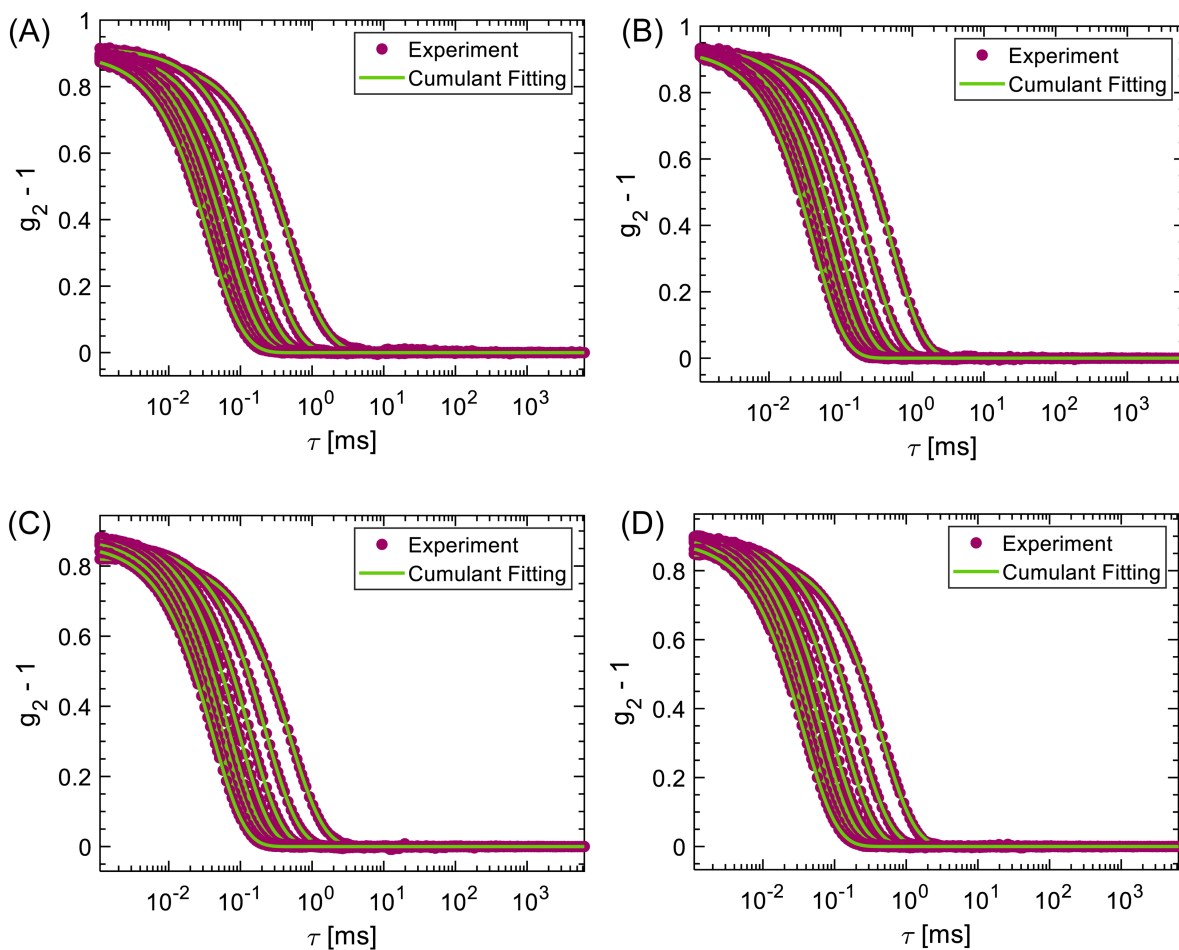

**Figure S3.** DLS  $g_2$  autocorrelation functions for (A) PEG-PHPMA, (B) PEG-PHPMA 10, (C), PEG-PHPMA 16, and (D) PEG-PHPMA 20. Eqn. 2 is fit to data

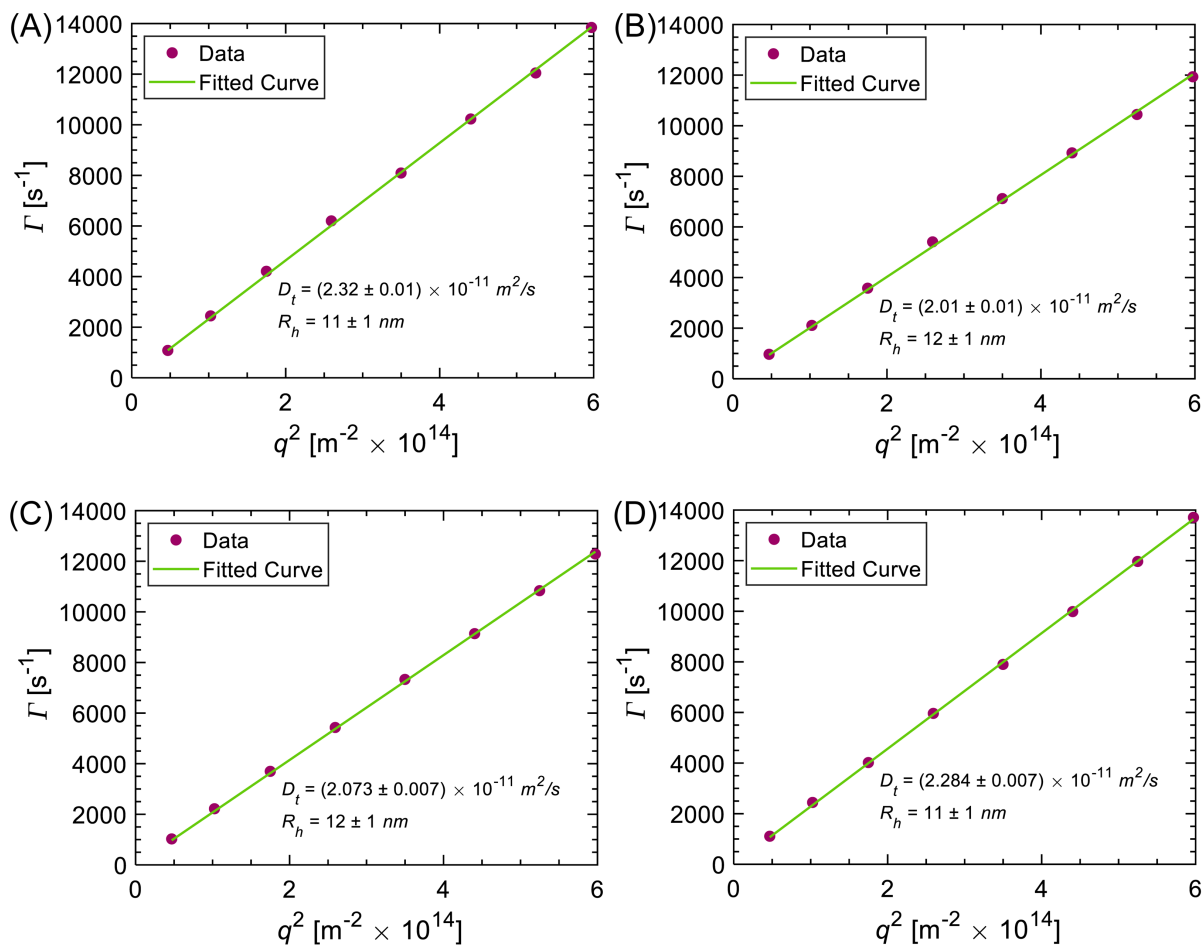

**Figure S4.** DLS  $\Gamma$  vs.  $q^2$  for (A) PEG-PHPMA, (B) PEG-PHPMA 10, (C), PEG-PHPMA 16, and (D) PEG-PHPMA 20. Eqn. 2 is fit to data

## S2. <sup>1</sup>H nuclear magnetic resonance (NMR) spectra

Figures S5 to S13 are the <sup>1</sup>H NMR spectra for PA, PEG, and PEG-PHPMA PISA solutions.

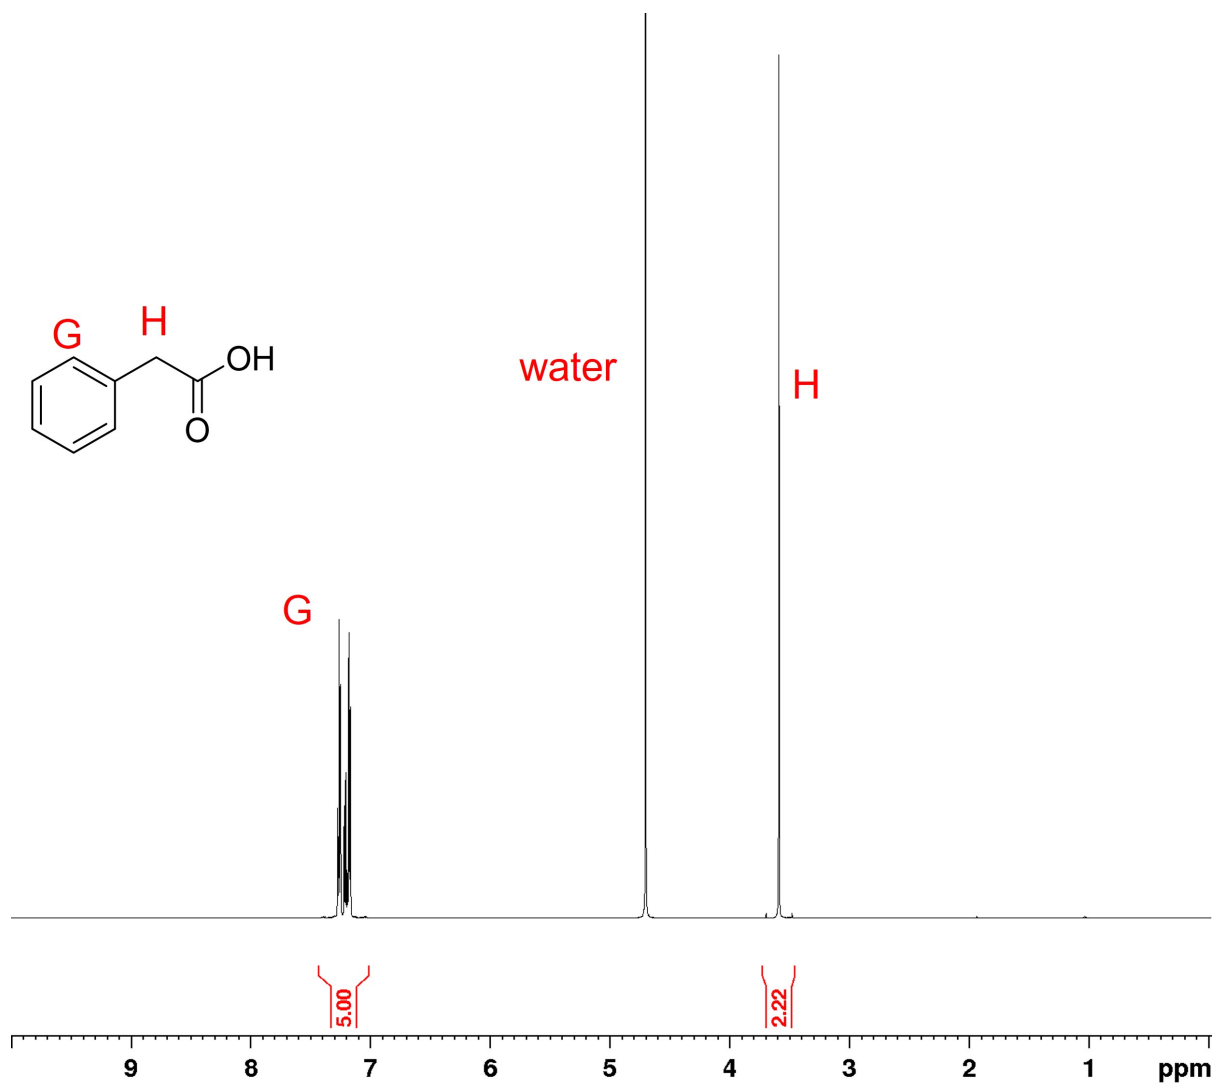

Figure S5.  $^1\text{H}$  NMR spectrum of 16 mg/mL of phenylacetic acid in  $\text{D}_2\text{O}$

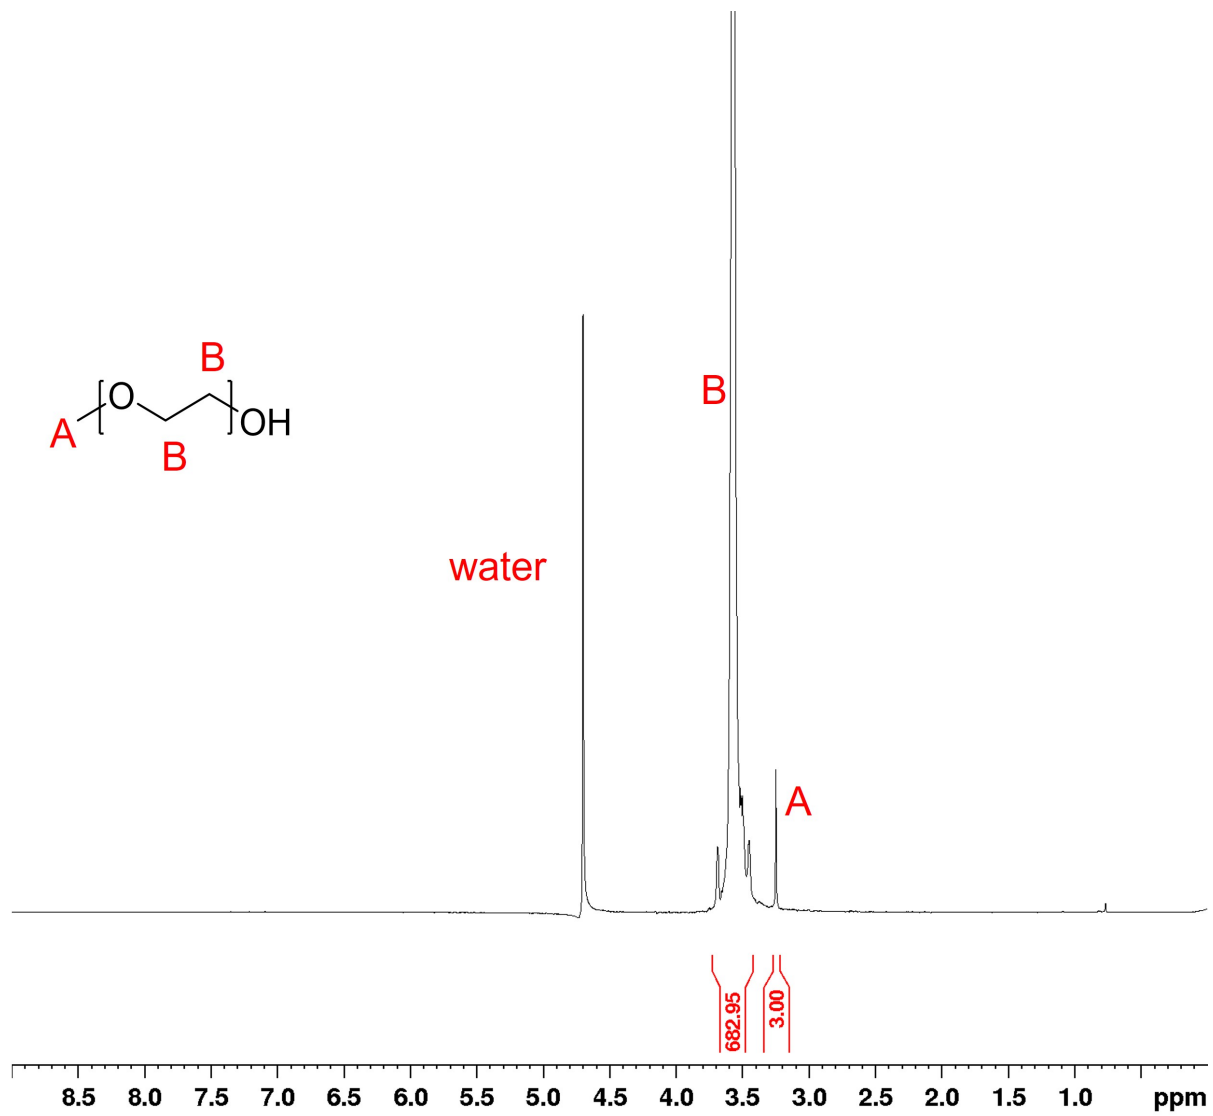

Figure S6.  $^1\text{H}$  NMR spectrum of PEG-OH in  $\text{D}_2\text{O}$

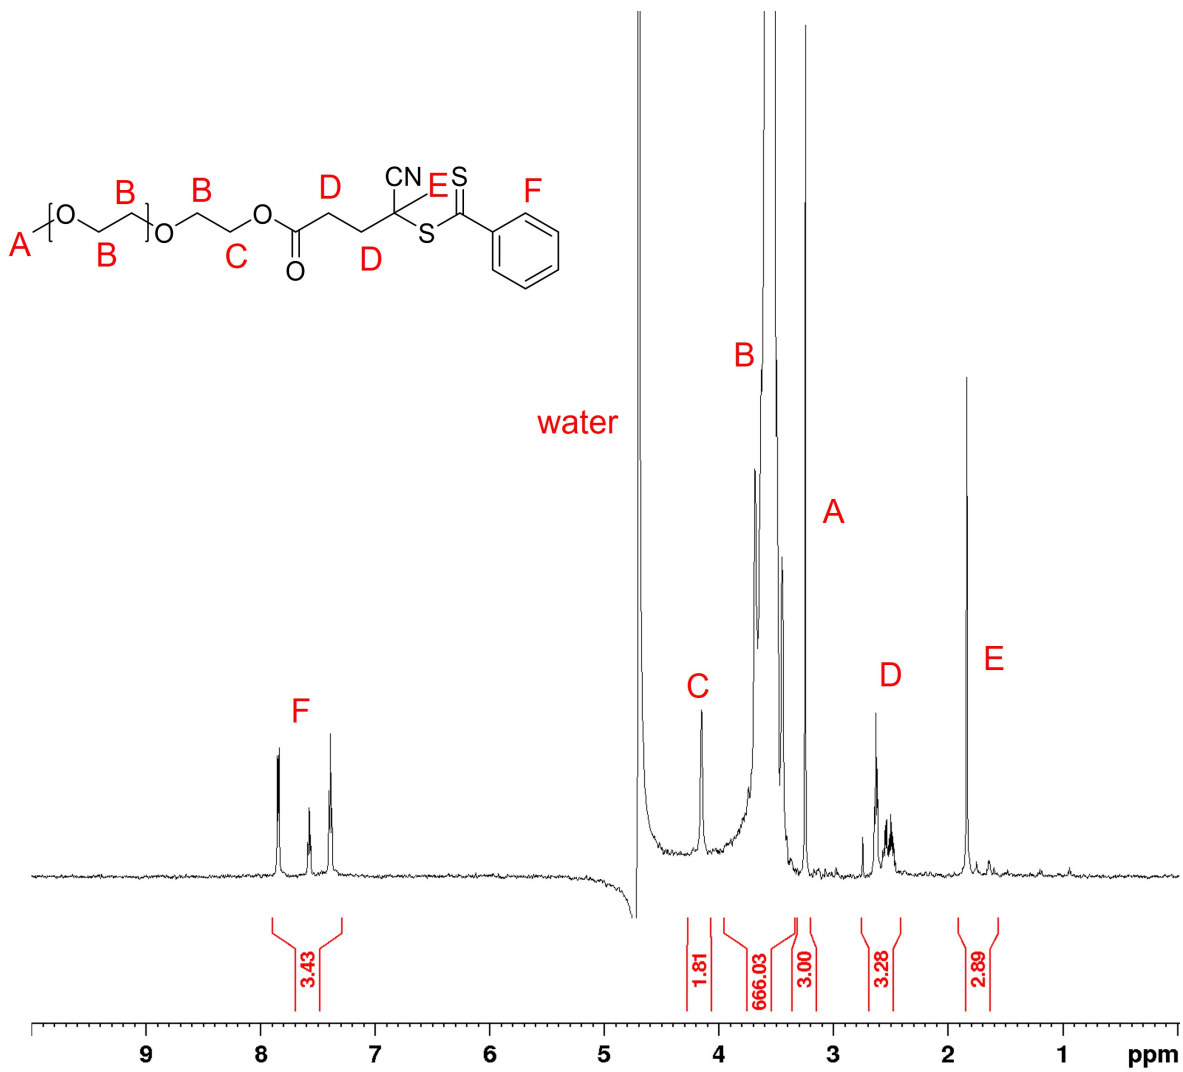

Figure S7. <sup>1</sup>H NMR spectrum of PEG 0 in D<sub>2</sub>O

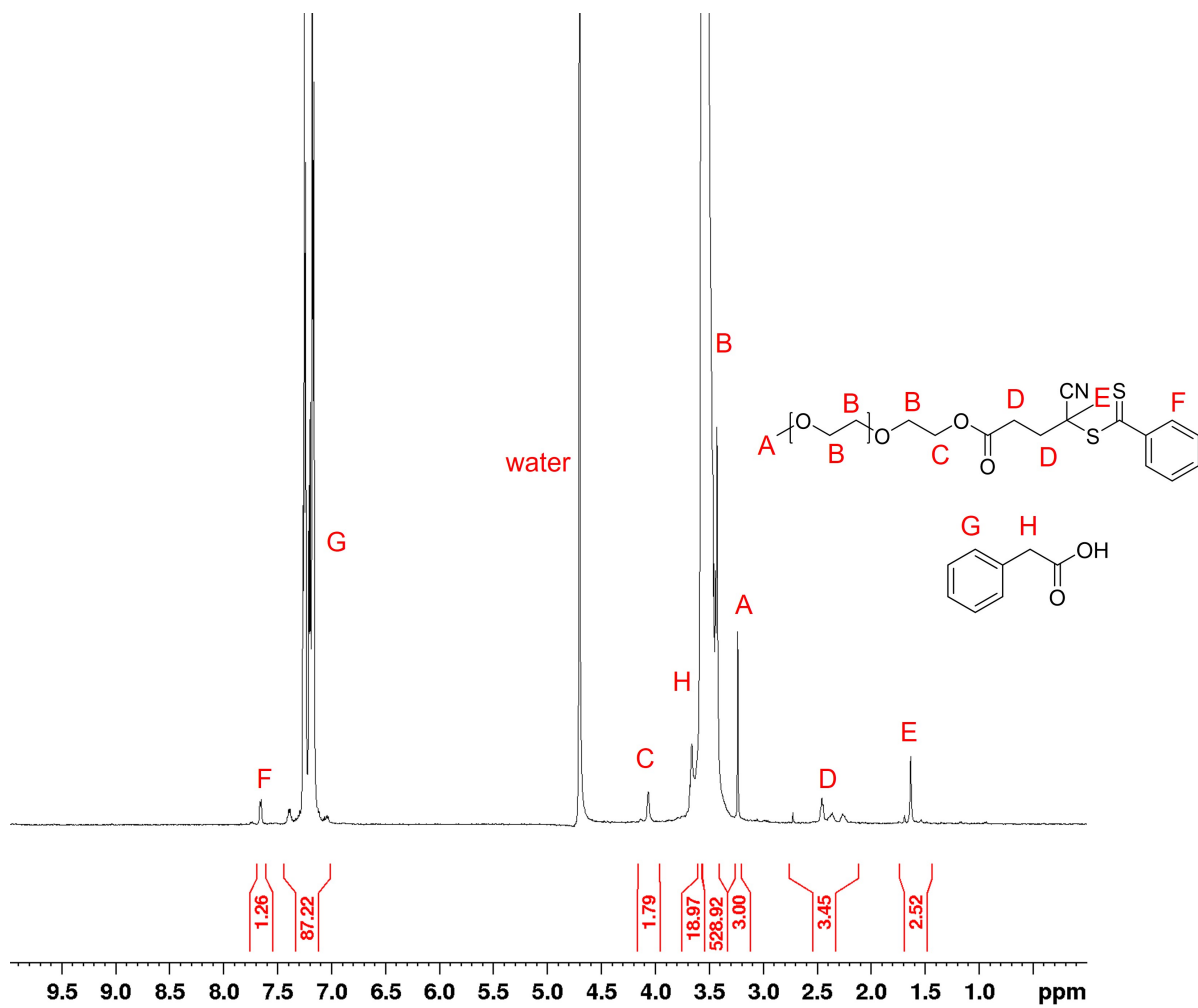

Figure S8. <sup>1</sup>H NMR spectrum of PEG 10 in D<sub>2</sub>O



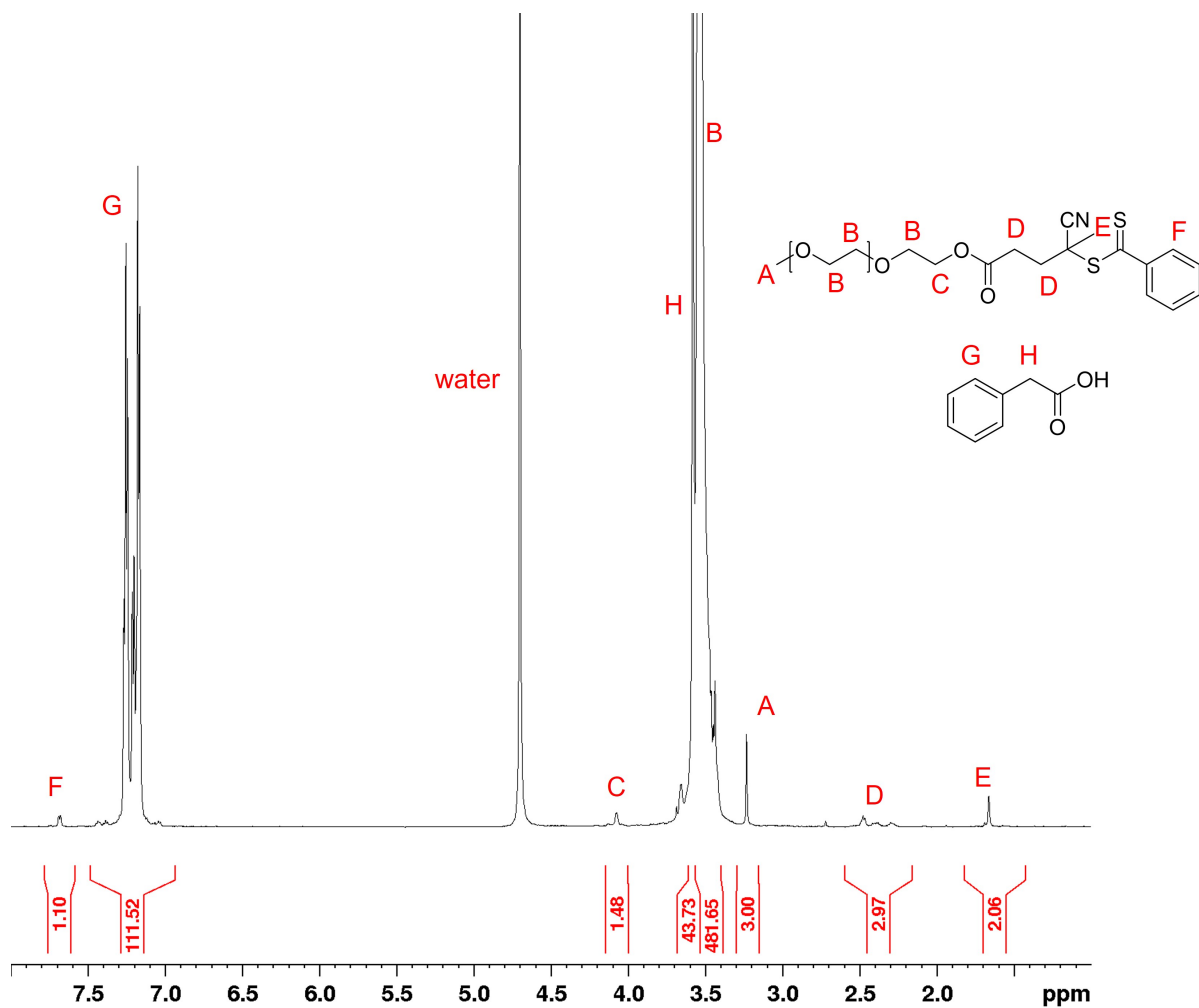

Figure S9.  $^1\text{H}$  NMR spectrum of filtered PEG 16 in  $\text{D}_2\text{O}$

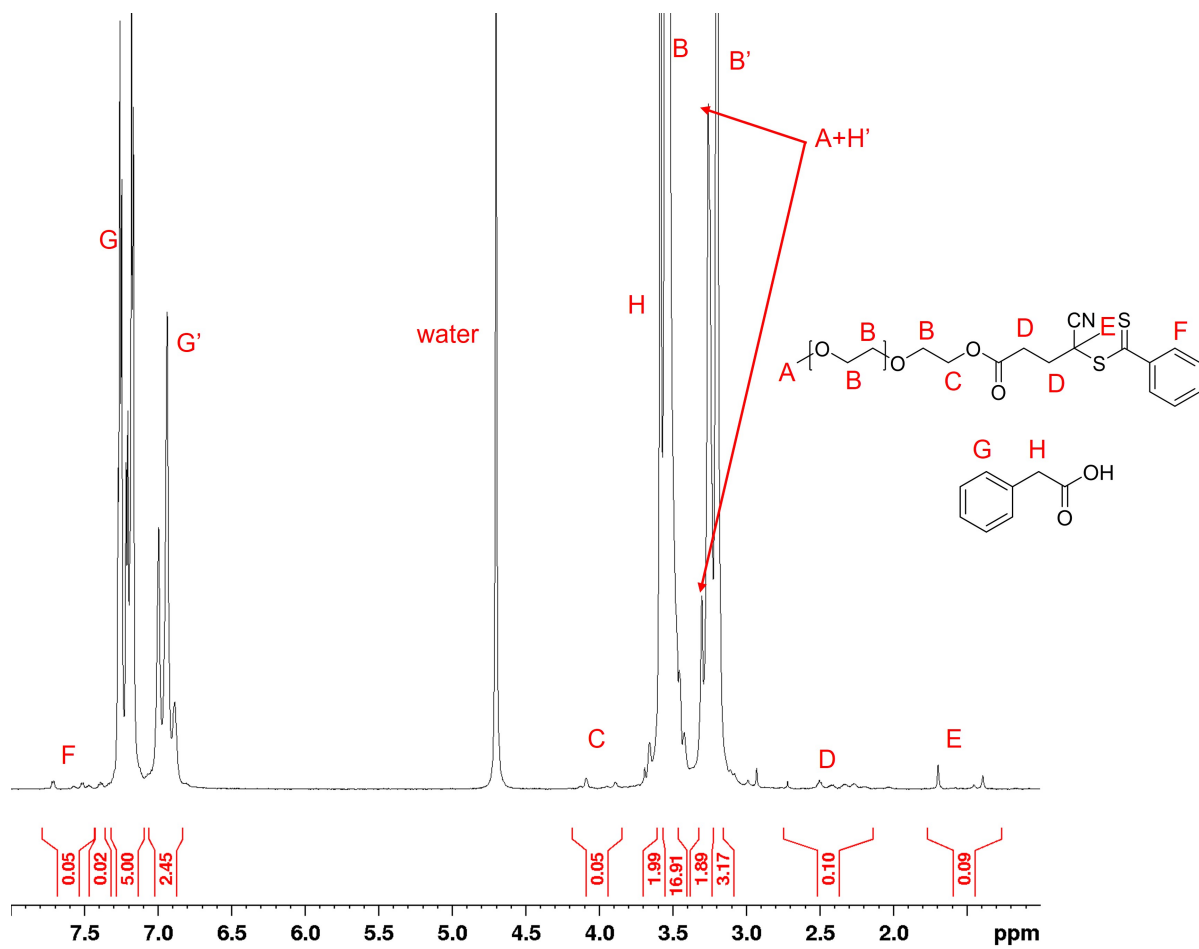

Figure S10. <sup>1</sup>H NMR spectrum of PEG 20 in D<sub>2</sub>O

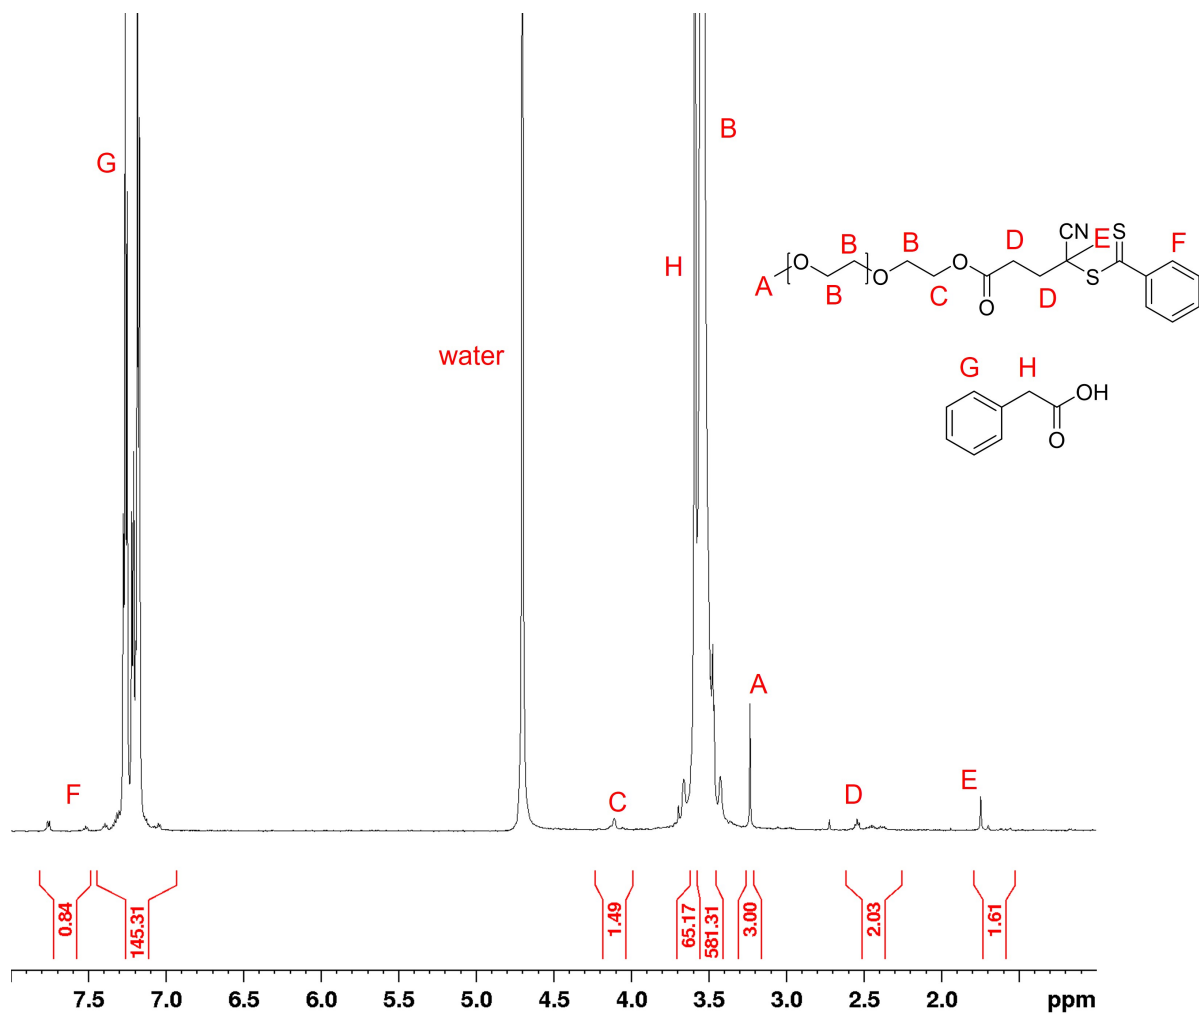

Figure S11.  $^1\text{H}$  NMR spectrum of filtered PEG 20 in  $\text{D}_2\text{O}$

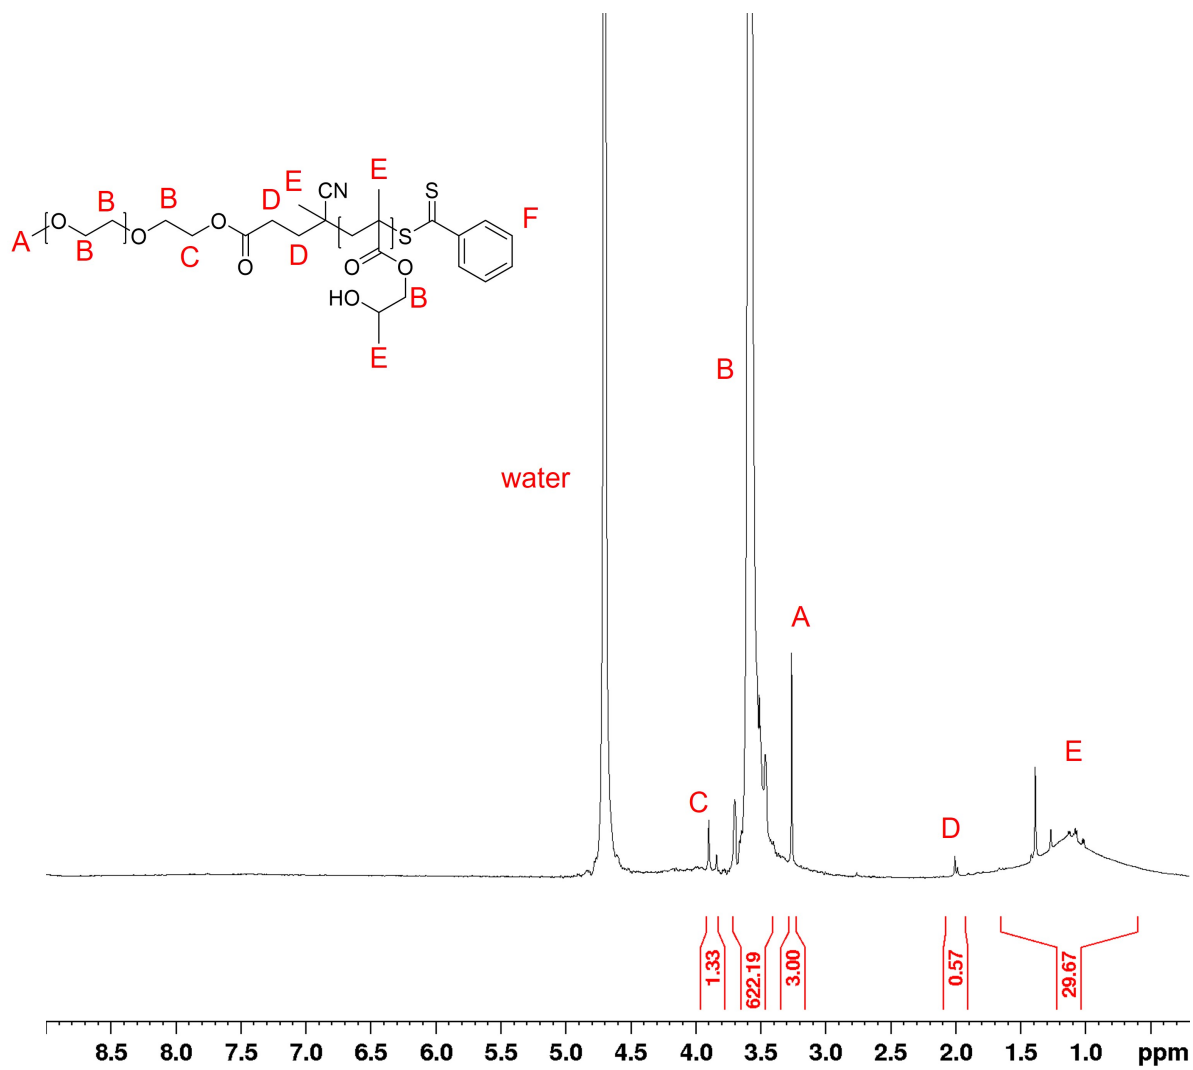

Figure S12.  $^1\text{H}$  NMR spectrum of PEG-PPMA 0 in  $\text{D}_2\text{O}$

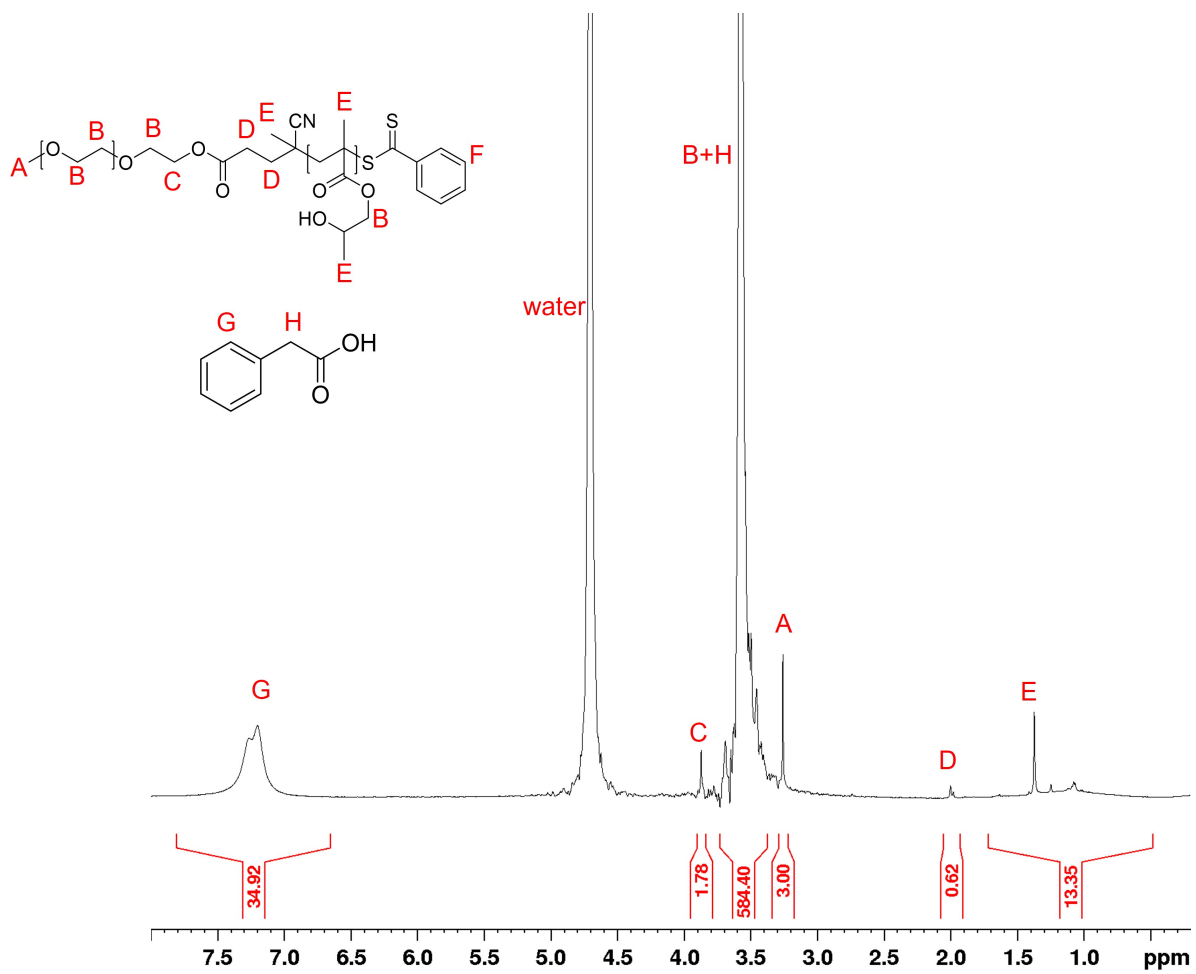

**Figure S13.** <sup>1</sup>H NMR spectrum of PEG-PHPMA 10 in D<sub>2</sub>O

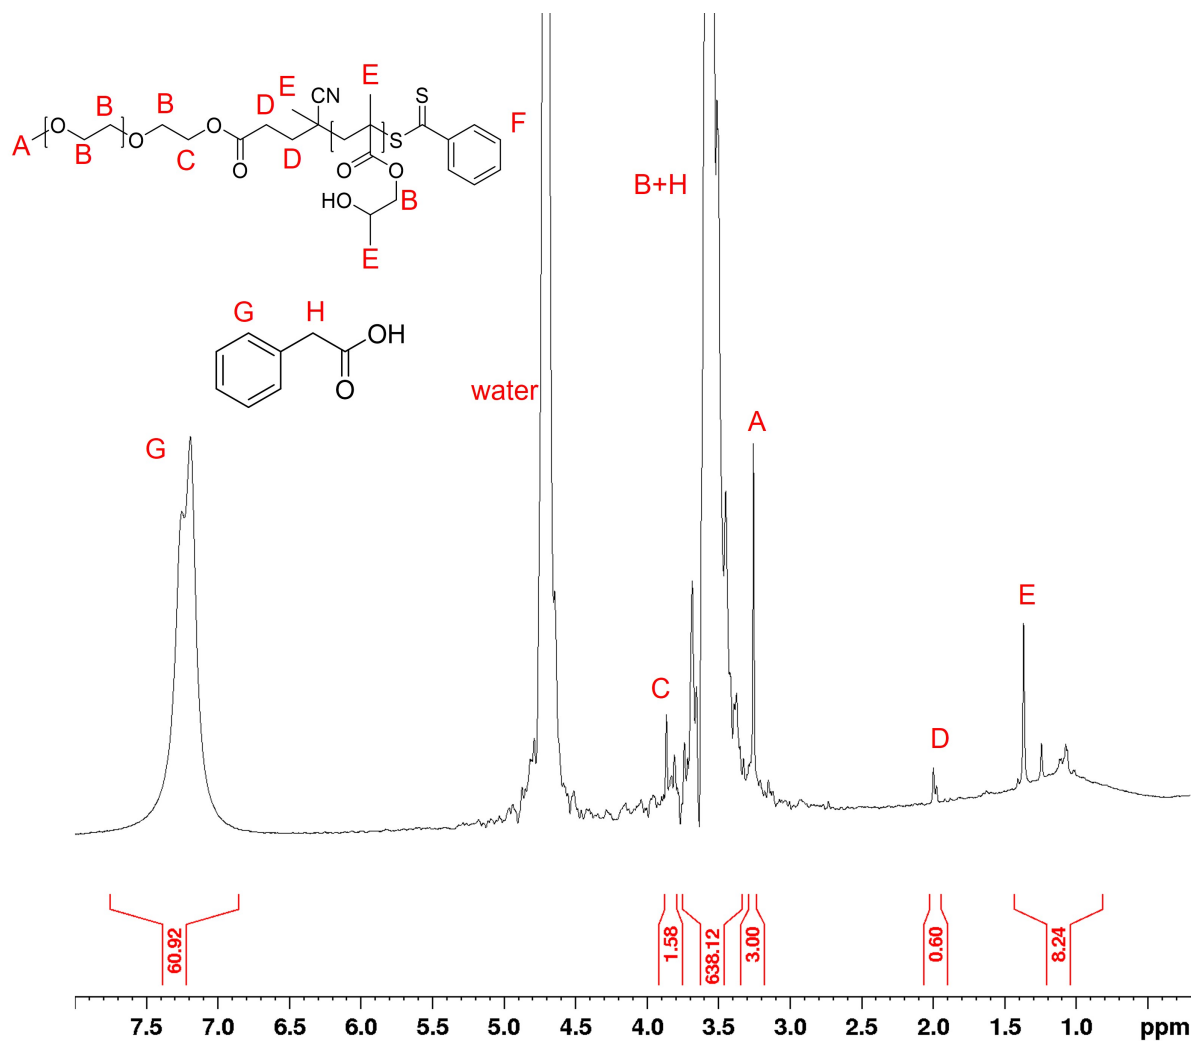

Figure S14.  $^1\text{H}$  NMR spectrum of PEG-PHPMA 16 in  $\text{D}_2\text{O}$

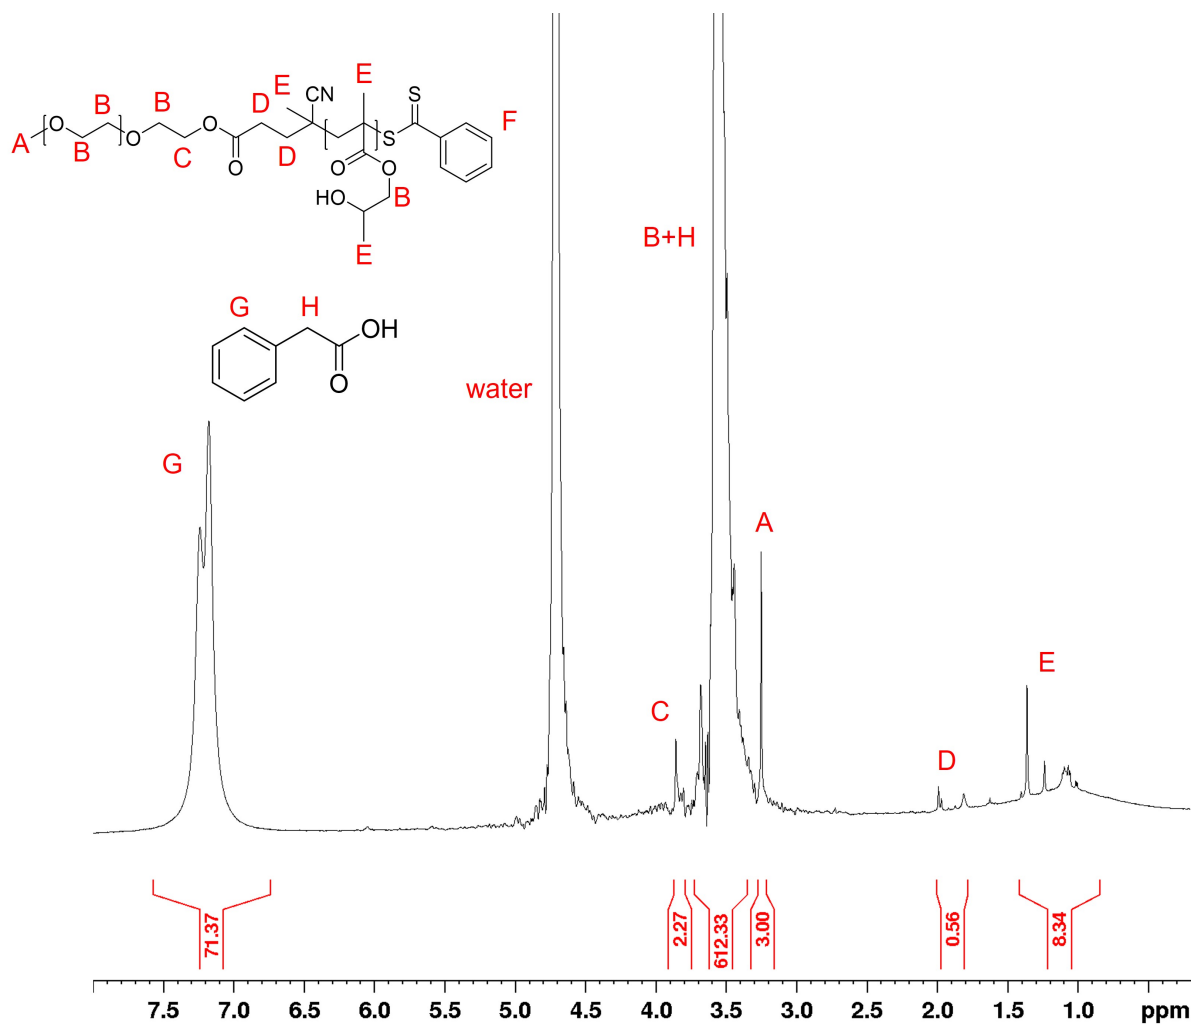

Figure S15.  $^1\text{H}$  NMR spectrum of PEG-PHPMA 20 in  $\text{D}_2\text{O}$

### S3. $^1\text{H}$ NMR diffusion ordered spectroscopy (DOSY) spectra waterfall plots for PEG 10 and PEG-PHPMA 10

Figures S16 and S17 are representative  $^1\text{H}$  NMR DOSY Waterfall Plots for PEG 10 and PEG-PHPMA 10.

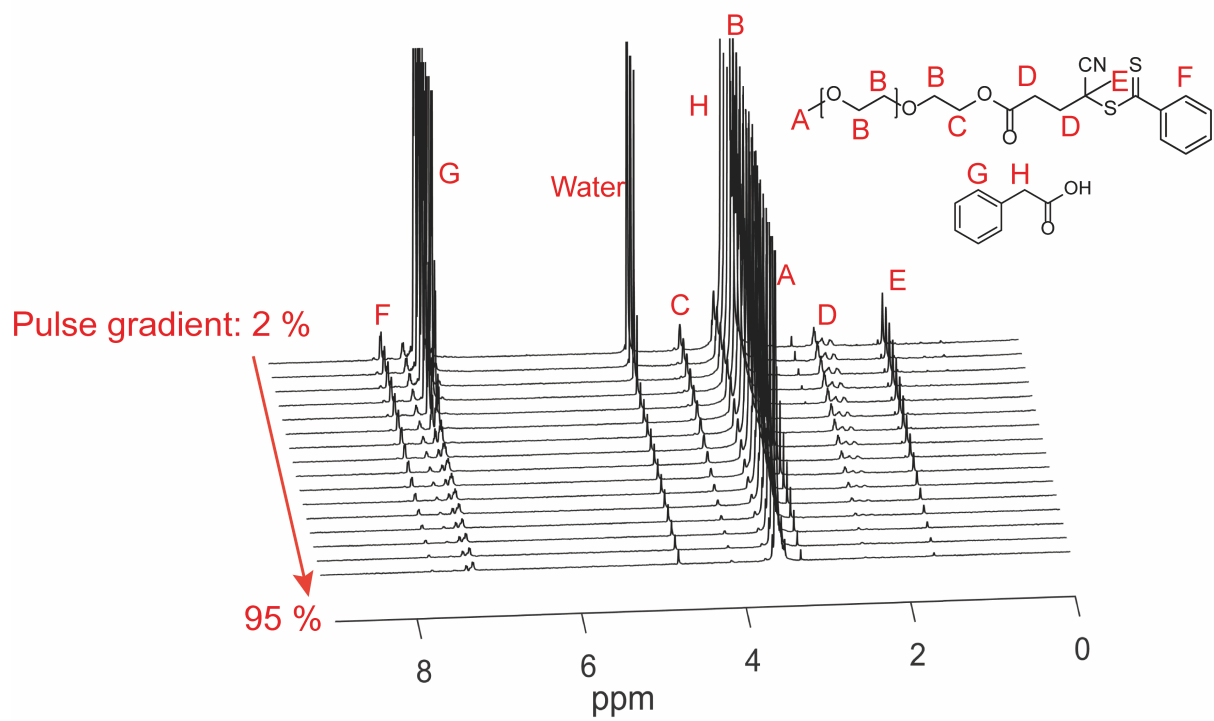

**Figure S16.**  $^1\text{H}$  NMR DOSY spectra waterfall plots for PEG 10 in  $\text{D}_2\text{O}$



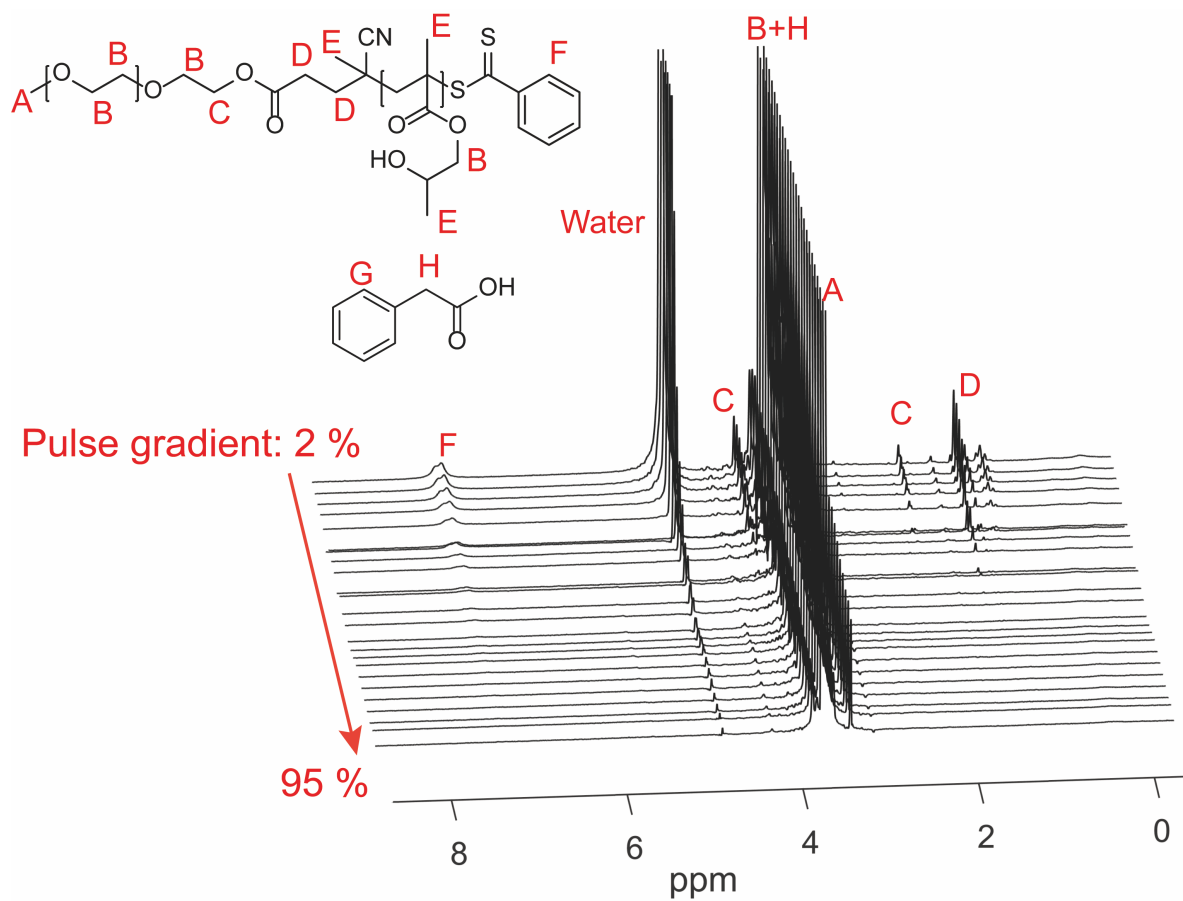

**Figure S17.**  $^1\text{H}$  NMR DOSY spectra waterfall plots for PEG-PHPMA 10 in  $\text{D}_2\text{O}$

#### S4. $^1\text{H}$ NMR DOSY fit parameters for PEG solutions

Figure S18 shows the Eqns. 7 and 9 fits to the PEG 20  $^1\text{H}$  NMR DOSY echo decays. Tables S1 to S3 details the  $^1\text{H}$  NMR DOSY fit parameters for PEG solutions.

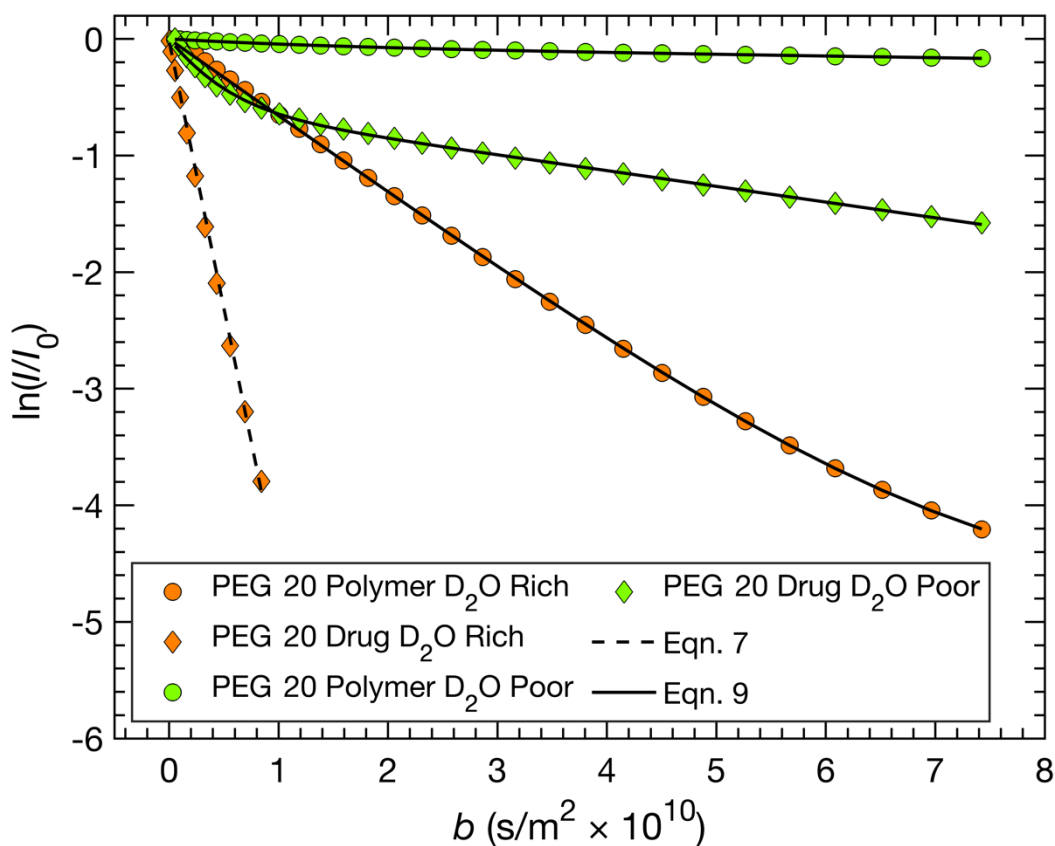

**Figure S18.**  $^1\text{H}$  NMR DOSY echo decays for PEG 20

**Table S1.**  $^1\text{H}$  NMR DOSY Eqn. 9 fit parameters for PEG Solutions polymer echo decays (Peak B and B')

| Sample                       | $f_{DOSY}$      | $D_{DOSY,1}$<br>[ $\text{s/m}^2 \times 10^{11}$ ] | $D_{DOSY,2}$<br>[ $\text{s/m}^2 \times 10^{11}$ ] |
|------------------------------|-----------------|---------------------------------------------------|---------------------------------------------------|
| PEG 0                        | $0.99 \pm 0.01$ | $6.5 \pm 0.1$                                     | $0.01 \pm 0.01$                                   |
| PEG 10                       | $0.84 \pm 0.01$ | $6.5 \pm 0.1$                                     | $3.1 \pm 0.1$                                     |
| PEG 16 D <sub>2</sub> O Rich | $0.99 \pm 0.01$ | $6.3 \pm 0.1$                                     | $0.2 \pm 0.1$                                     |
| PEG 16 D <sub>2</sub> O Poor | $0.07 \pm 0.01$ | $5.4 \pm 0.2$                                     | $0.1 \pm 0.1$                                     |
| PEG 20 D <sub>2</sub> O Rich | $0.99 \pm 0.01$ | $6.7 \pm 0.1$                                     | $0.01 \pm 0.01$                                   |
| PEG 20 D <sub>2</sub> O Poor | $0.06 \pm 0.01$ | $6.4 \pm 0.3$                                     | $0.1 \pm 0.1$                                     |

**Table S2.**  $^1\text{H}$  NMR DOSY Eqn. 7 fit parameters for PA and PEG solutions drug echo decays (Peak G)

| Sample      | $D_{DOSY}$<br>[ $\text{s/m}^2 \times 10^{11}$ ] |
|-------------|-------------------------------------------------|
| PA 16 mg/mL | $67.3 \pm 0.2$                                  |
| PEG 10      | $48.7 \pm 0.4$                                  |

|                              |            |
|------------------------------|------------|
| PEG 16 D <sub>2</sub> O Rich | 45.6 ± 0.6 |
| PEG 20 D <sub>2</sub> O Rich | 45.8 ± 0.6 |

**Table S3.** <sup>1</sup>H NMR DOSY Eqn. 9 fit parameters for PEG solutions drug echo decays (Peak G')

| Sample                       | $f_{DOSY}$  | $D_{DOSY,1}$<br>[s/m <sup>2</sup> × 10 <sup>11</sup> ] | $D_{DOSY,2}$<br>[s/m <sup>2</sup> × 10 <sup>11</sup> ] |
|------------------------------|-------------|--------------------------------------------------------|--------------------------------------------------------|
| PEG 16 D <sub>2</sub> O Poor | 0.43 ± 0.01 | 23.5 ± 0.9                                             | 1.4 ± 0.1                                              |
| PEG 20 D <sub>2</sub> O Poor | 0.45 ± 0.01 | 23.9 ± 0.8                                             | 1.4 ± 0.1                                              |

### S5. <sup>1</sup>H NMR DOSY plots and fit parameters for PEG-PHPMA PISA solutions

Figure S19 shows the Eqn. 9 fits to the PEG-PHPMA <sup>1</sup>H NMR DOSY Echo Decays. Tables S4 to S6 detail the fit parameters.

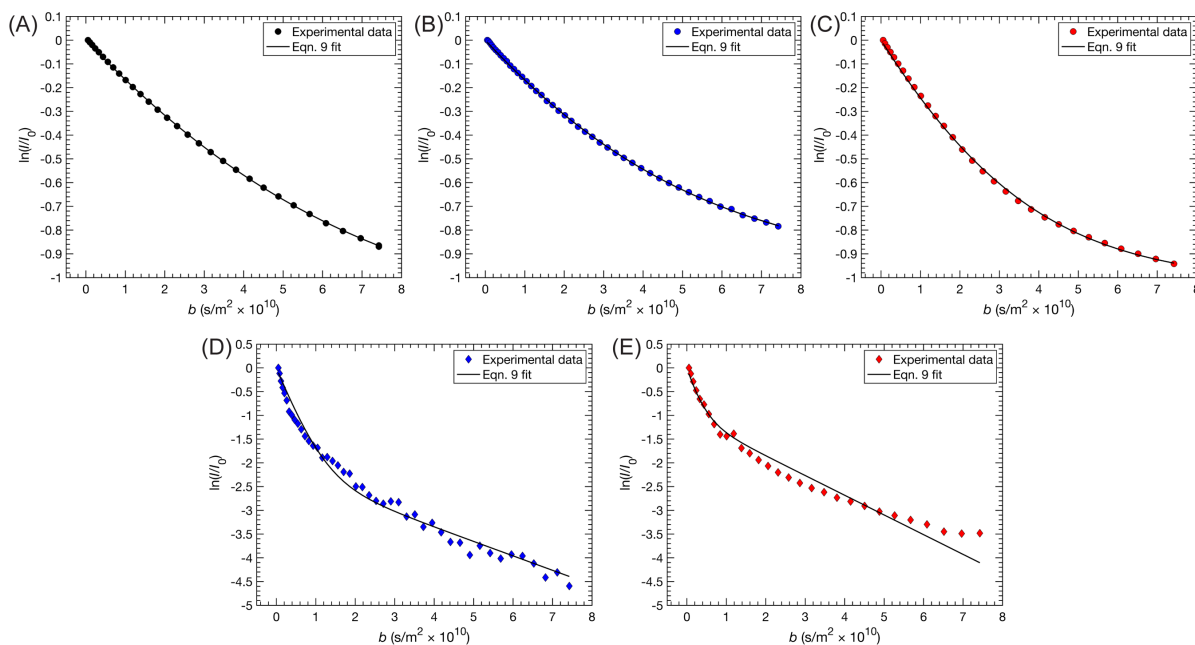

**Figure S19.** <sup>1</sup>H NMR DOSY echo decays for (A) PEG-PHPMA 0 polymer, (B) PEG-PHPMA 10 polymer, (C) PEG-PHPMA 10 drug, and (D) PEG-PHPMA 20 drug. For fitting Eqn. 9 to data depicted in (C) and (D), the drug  $D_{DOSY,2}$  = polymer  $D_{DOSY,1}$  constraint was employed.

**Table S4.** <sup>1</sup>H NMR DOSY Eqn. 9 fit parameters for PEG-PHPMA PISA solutions polymer echo decays (Peak B)

| Sample      | $f_{DOSY}$  | $D_{DOSY,1}$<br>[s/m <sup>2</sup> × 10 <sup>11</sup> ] | $D_{DOSY,2}$<br>[s/m <sup>2</sup> × 10 <sup>11</sup> ] |
|-------------|-------------|--------------------------------------------------------|--------------------------------------------------------|
| PEG-PHPMA 0 | 0.63 ± 0.05 | 2.7 ± 0.2                                              | 0.1 ± 0.1                                              |

|              |                 |               |                 |
|--------------|-----------------|---------------|-----------------|
| PEG-PHPMA 10 | $0.58 \pm 0.03$ | $3.0 \pm 0.1$ | $0.09 \pm 0.07$ |
| PEG-PHPMA 16 | $0.62 \pm 0.06$ | $3.2 \pm 0.3$ | $0.01 \pm 0.01$ |
| PEG-PHPMA 20 | $0.64 \pm 0.03$ | $3.7 \pm 0.2$ | $0.01 \pm 0.01$ |

**Table S5.**  $^1\text{H}$  NMR DOSY Eqn. 9 fit parameters for PEG-PHPMA PISA solutions drug echo decays (Peak G, drug  $D_{DOSY,2}$  is adjustable parameter)

| Sample       | $f_{DOSY}$      | $D_{DOSY,1}$<br>[ $\text{s}/\text{m}^2 \times 10^{11}$ ] | $D_{DOSY,2}$<br>[ $\text{s}/\text{m}^2 \times 10^{11}$ ] |
|--------------|-----------------|----------------------------------------------------------|----------------------------------------------------------|
| PEG-PHPMA 10 | $0.87 \pm 0.01$ | $69 \pm 6$                                               | $4.6 \pm 0.2$                                            |
| PEG-PHPMA 16 | $0.78 \pm 0.02$ | $45 \pm 5$                                               | $3.4 \pm 0.2$                                            |
| PEG-PHPMA 20 | $0.82 \pm 0.01$ | $28 \pm 2$                                               | $2.9 \pm 0.1$                                            |

**Table S6.**  $^1\text{H}$  NMR DOSY Eqn. 9 fit parameters for PEG-PHPMA PISA solutions drug echo decays (Peak G, drug  $D_{DOSY,2} = \text{polymer } D_{DOSY,1}$  constraint applied)

| Sample       | $f_{DOSY}$      | $D_{DOSY,1}$<br>[ $\text{s}/\text{m}^2 \times 10^{11}$ ] |
|--------------|-----------------|----------------------------------------------------------|
| PEG-PHPMA 10 | $0.88 \pm 0.01$ | $22 \pm 1$                                               |
| PEG-PHPMA 16 | $0.72 \pm 0.02$ | $28 \pm 3$                                               |
| PEG-PHPMA 20 | $0.70 \pm 0.03$ | $30 \pm 4$                                               |

### S6. $^1\text{H}$ NMR DOSY fit parameters for water

Table S7 details the Eqn. 7 fit parameters for  $^1\text{H}$  NMR DOSY echo decays for the water peak.

**Table S7.**  $^1\text{H}$  NMR DOSY Eqn. 7 fit parameter for PA, PEG, and PEG-PHPMA solutions water echo decays

| Sample       | $D_{DOSY,H2O}$<br>[ $\text{s}/\text{m}^2 \times 10^{11}$ ] |
|--------------|------------------------------------------------------------|
| PA 16 mg/mL  | $180 \pm 10$                                               |
| PEG 0        | $160 \pm 10$                                               |
| PEG 10       | $160 \pm 10$                                               |
| PEG 16       | $160 \pm 10$                                               |
| PEG 20       | $160 \pm 10$                                               |
| PEG-PHPMA 0  | $130 \pm 10$                                               |
| PEG-PHPMA 10 | $110 \pm 10$                                               |
| PEG-PHPMA 16 | $90 \pm 10$                                                |
| PEG-PHPMA 20 | $110 \pm 10$                                               |

### S7. PEG-PHPMA PISA solution viscosity adjustment

To account for the increase in bulk viscosity in the PEG-PHPMA PISA solution, the diffusion coefficients for PA in D<sub>2</sub>O without polymer ( $D_{PA,D2O}^*$ ) and PEG aggregates ( $D_{agg}^*$ ) were adjusted using Eqns. S1 and S2

$$D_{PA,D2O}^* = D_{PA,D2O} \frac{D_{DOSY,H2O}^*}{D_{DOSY,H2O}} \quad (S1)$$

$$D_{agg}^* = D_{agg} \frac{D_{DOSY,H2O}^*}{D_{DOSY,H2O}} \quad (S2)$$

where  $D_{DOSY,H2O}$  is the average water diffusion coefficient in the PEG solutions and  $D_{DOSY,H2O}^*$  is the average water diffusion coefficient in the PEG-PHPMA PISA solutions.  $D_{PA,D2O}$  was determined from the 16 mg/mL phenylacetic acid in D<sub>2</sub>O solution.  $D_{agg}$  corresponds to the PEG  $D_{DOSY,2}$  value determined from the PEG solutions.

### S8. PEG-PHPMA UV size-exclusion chromatography (SEC) trace deconvolution

UV SEC traces of PEG-PHPMA block copolymer were deconvoluted using custom Matlab scripts. First, Eqn. S3 was fit to the UV SEC trace intensity of the PEG macro-RAFT agent ( $I_{SEC}$ )

$$I_{SEC} = I_0 \left( \frac{f_L/\pi}{1 + \left(\frac{t-t_0}{\gamma}\right)^2} + \frac{(1-f_L)}{\sigma\sqrt{2\pi}} \exp\left(-\frac{1}{2} \frac{(t-t_0)^2}{\sigma^2}\right) \right) + BG \quad (S3)$$

where  $t$  is the retention time,  $t_0$  is the peak time,  $I_0$  is the maximum peak height,  $f_L$  is the fractional contribution of the Lorentzian term,  $\gamma$  is the width of the Lorentzian term,  $\sigma$  is the standard deviation of the Gaussian term, and  $BG$  is a background term. Then, Eqn. S3 was fit to the UV SEC trace intensity of each PEG-PHPMA block copolymer sample ( $I_{PEG-PHPMA}$ )

$$I_{PEG-PHPMA} = I_{BCP} + I_{PEG} + BG \quad (S4)$$

where  $I_{BCP}$  and  $I_{PEG}$  correspond to the block copolymer and unreacted PEG macro-RAFT agent peaks, respectively. Both  $I_{BCP}$  and  $I_{PEG}$  are described using the first term in Eqn. S3. To reduce the number of adjustable fit parameters when fitting Eqn. S4 to the PEG-PHPMA data, the  $f_L$ ,  $\gamma$ , and  $\sigma$  values estimated from the PEG SEC trace are used for the  $I_{PEG}$  term.

Figure S20 shows the UV SEC trace deconvolution for PEG-PHPMA 0. Table S8 lists the deconvolution parameters for the PEG-PHPMA PISA samples.  $M_{N,BCP}$  and  $\mathcal{D}_{BCP}$  are the number average molar mass and dispersity of the PEG-PHPMA block copolymer peak.  $I_{BCP,0}$  and  $I_{PEG,0}$  represent the maximum heights of the PEG-PHPMA block copolymer and unreacted PEG macro-RAFT agent peaks, respectively.

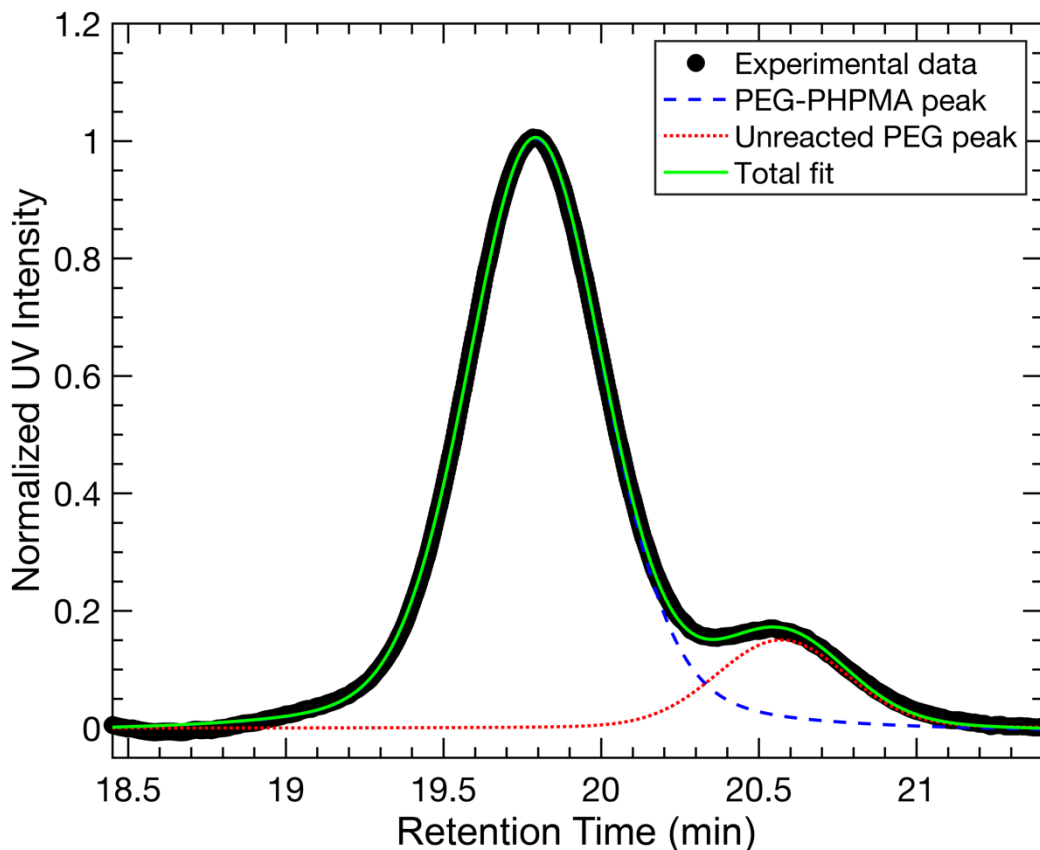

**Figure S20.** Deconvolution of PEG-PHPMA 0 UV SEC trace

**Table S8.** PEG-PHPMA molar mass properties

| Sample       | $M_{N,BCP}$<br>[kg/mol] | $D_{BCP}$ | $\frac{I_{PEG,0}}{I_{BCP,0} + I_{PEG,0}}$ |
|--------------|-------------------------|-----------|-------------------------------------------|
| PEG-PHPMA 0  | 12.6                    | 1.09      | 0.11                                      |
| PEG-PHPMA 10 | 12.7                    | 1.13      | 0.09                                      |
| PEG-PHPMA 16 | 13.9                    | 1.14      | 0.08                                      |
| PEG-PHPMA 20 | 12.7                    | 1.12      | 0.14                                      |

## S9. PEG-PHPMA PISA kinetics

Figure S21 depicts PISA kinetics data for PEG-PHPMA 0, PEG-PHPMA 10, and PEG-PHPMA 20 samples.

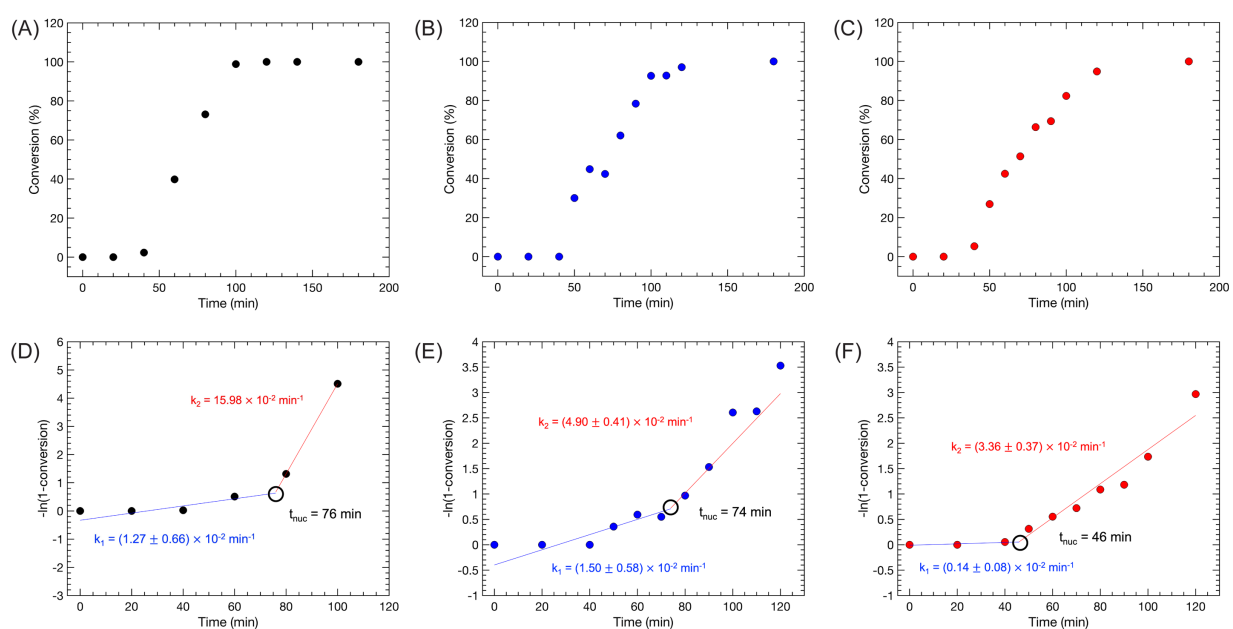

**Figure S21.** PEG-PHPMA PISA kinetics. HPMA conversion vs. time for (A) PEG-PHPMA 0, (B) PEG-PHPMA 10, and (C) PEG-PHPMA 20. First order kinetics plot for (D) PEG-PHPMA 0, (E) PEG-PHPMA 10 and (F) PEG-PHPMA 20

## S11. Impact of initiator concentration on PEG-PHPMA PISA

To investigate the source of the unreacted PEG chains that remain during PISA, preliminary investigations were performed on PEG-PHPMA block copolymers. The targeted PHPMA degree of polymerization was 90.

Figure S22 and Table S9 depict the UV SEC trace of PEG-PHPMA block copolymers prepared by PISA with varying PEG macro-RAFT agent to AIPD initiator ratio ( $[\text{RAFT}]:[\text{AIPD}]$ ). For this experiment,  $[\text{RAFT}]$  was kept constant at 0.036 M and  $[\text{AIPD}]$  was decreased. In general, the number of terminated chains produced by RAFT polymerization should decrease as  $[\text{RAFT}]:[\text{AIPD}]$  increases.<sup>S1</sup> That trend, however, is not observed in Figure S21. Rather, increasing  $[\text{RAFT}]:[\text{AIPD}]$  from 3:1 to 6:1 does not affect the unreacted PEG shoulder observed near 20.5 min. Increasing the ratio to 10:1 leads to a very large shoulder, as the rate of HPMA polymerization is greatly reduced. Decreasing the  $[\text{RAFT}]:[\text{AIPD}]$  to 1.5:1 leads to a slightly larger PEG-PHPMA molar mass, but a large fraction of unreacted PEG RAFT agent remains. Along with the presence of the UV-active CPPA end group on the chains, the insensitivity towards the  $[\text{RAFT}]:[\text{AIPD}]$  ratio demonstrates that the unreacted PEG chains have not undergone termination.



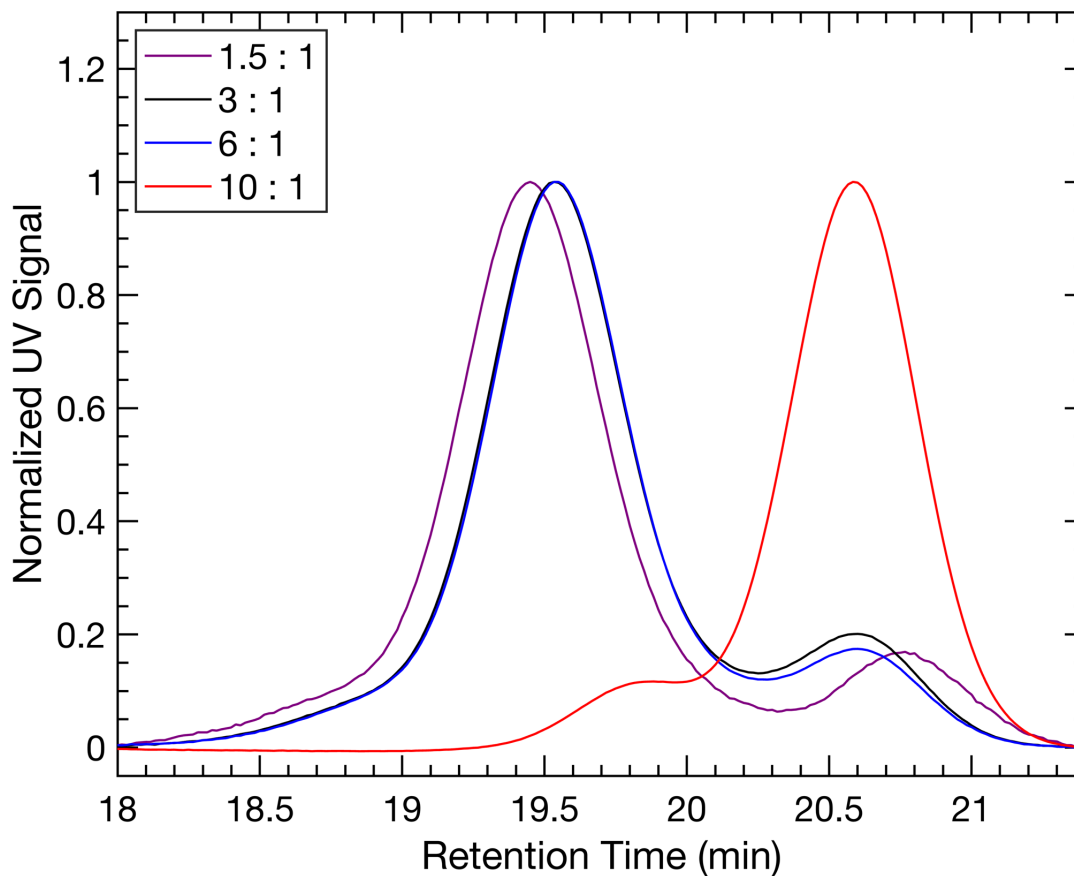

**Figure S22.** UV SEC trace of PEG-PHPMA produced by PISA with varying [RAFT]:[AIPD] ratios. The targeted PHPMA degree of polymerization was 90

**Table S9.** Molar mass characterization of PEG-PHPMA produced by PISA with varying [RAFT]:[AIPD] ratios. The targeted PHPMA degree of polymerization was 90

| [RAFT]:[AIPD]<br>ratio | $M_{N,BCP}$<br>[kg/mol] | $\mathcal{D}_{BCP}$ | $\frac{I_{PEG,0}}{I_{BCP,0} + I_{PEG,0}}$ |
|------------------------|-------------------------|---------------------|-------------------------------------------|
| 1.5:1                  | 18.3                    | 1.14                | 0.11                                      |
| 3:1                    | 15.3                    | 1.16                | 0.12                                      |
| 6:1                    | 15.2                    | 1.16                | 0.10                                      |
| 10:1                   | 8.83                    | 1.44                | 0.88                                      |

## S12. Impact of free PEG-OH chains on PEG-PHPMA PISA

To explore the impact of free PEG chains within the PISA solution, PEG-PHPMA 0 PISA reactions were performed in the presence of PEG-OH chains, which do not participate in PHPMA polymerization because they lack the CPPA end group.

Figure S23A shows the UV SEC of PEG-PHPMA 0 samples containing 0.5 and 1 eq. of PEG-OH relative to the PEG macro-RAFT agent. UV SEC, which does not detect PEG-OH, indicates that the PEG-PHPMA 0 molar mass distribution is unperturbed by the additional free chains. Figure S23B demonstrates that the free PEG-OH does not significantly affect the  $R_h$  distribution of the micelles, as observed by DLS. Figure S23C depicts  $^1\text{H}$  NMR DOSY decays of the PEG-PHPMA and PEG-OH solutions. Due to the biexponential shape, Eqn. 9 was fit to each echo decay (see Table S9 for fit parameters). For the fast diffusion mode, the samples containing additional PEG-OH each produce  $D_{DOSY,1} \approx 2.5 \times 10^{-10} \text{ m}^2/\text{s}$ .  $f_{DOSY}$ , however, increases with increasing PEG-OH amounts. This relationship suggests that the fast diffusion mode observed by  $^1\text{H}$  NMR DOSY describes the diffusion of both PEG-PHPMA micelles and PEG unimer chains. The slow diffusion mode produces  $D_{DOSY,2} \approx 1 \times 10^{-13} \text{ m}^2/\text{s}$ .

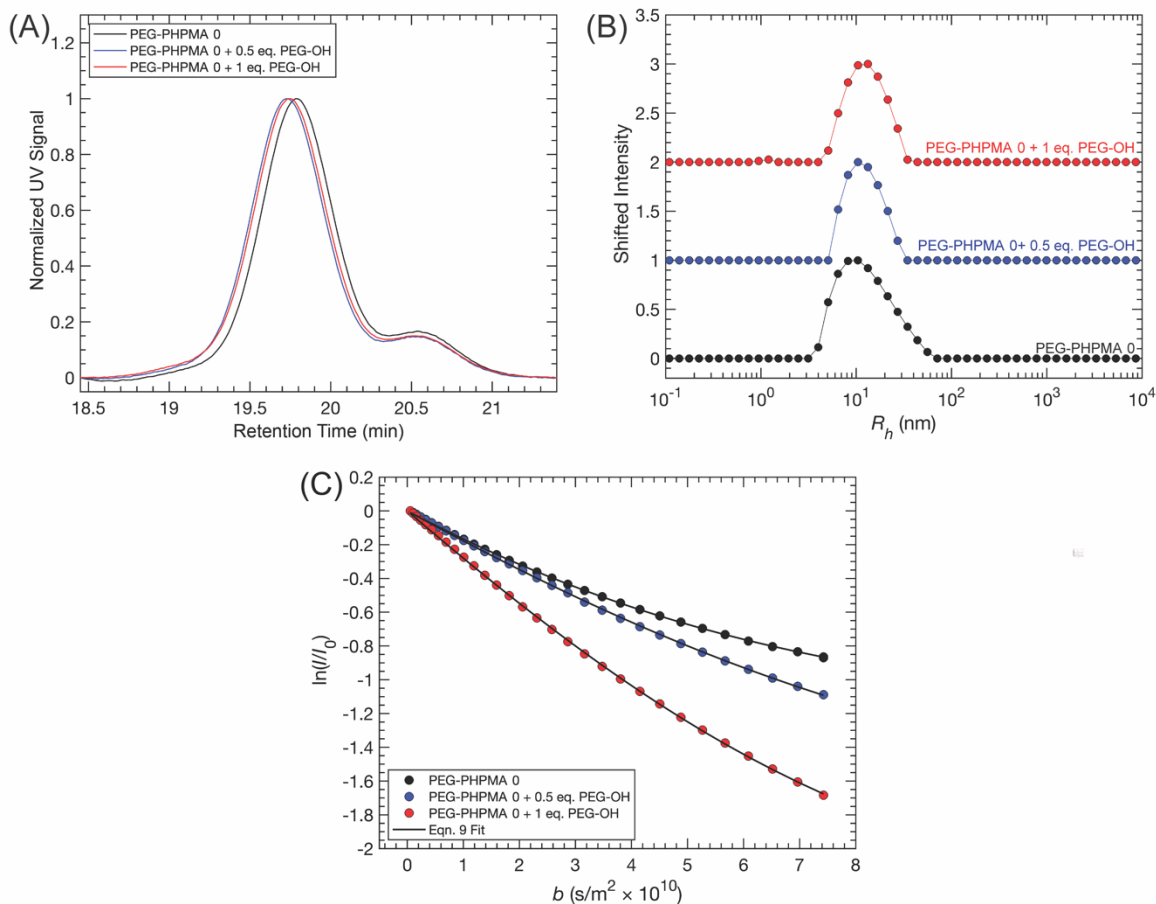

**Figure S23.** Characterization of PEG-PHPMA 0 PISA solutions with varying amounts of additional PEG-OH. (A) UV SEC, (B) DLS  $R_h$  distributions, and (C)  $^1\text{H}$  NMR DOSY polymer echo decays

**Table S9.**  $^1\text{H}$  NMR DOSY Eqn. 9 Fit Parameters for PEG-PHPMA PISA Solutions Polymer Echo Decays (Peak B)

| Sample                       | $f_{DOSY}$  | $D_{DOSY,1}$<br>[s/m <sup>2</sup> × 10 <sup>11</sup> ] | $D_{DOSY,2}$<br>[s/m <sup>2</sup> × 10 <sup>11</sup> ] |
|------------------------------|-------------|--------------------------------------------------------|--------------------------------------------------------|
| PEG-PHPMA 0 + 0.5 eq. PEG-OH | 0.82 ± 0.05 | 2.3 ± 0.1                                              | 0.01 ± 0.01                                            |
| PEG-PHPMA 0 + 1.0 eq. PEG-OH | 0.88 ± 0.04 | 3.2 ± 0.3                                              | 0.2 ± 0.4                                              |

### S13. PEG 0 DLS hydrodynamic radius distribution

Figure S23 is the PEG 0 DLS  $R_h$  distribution with the intensity axis enlarged.

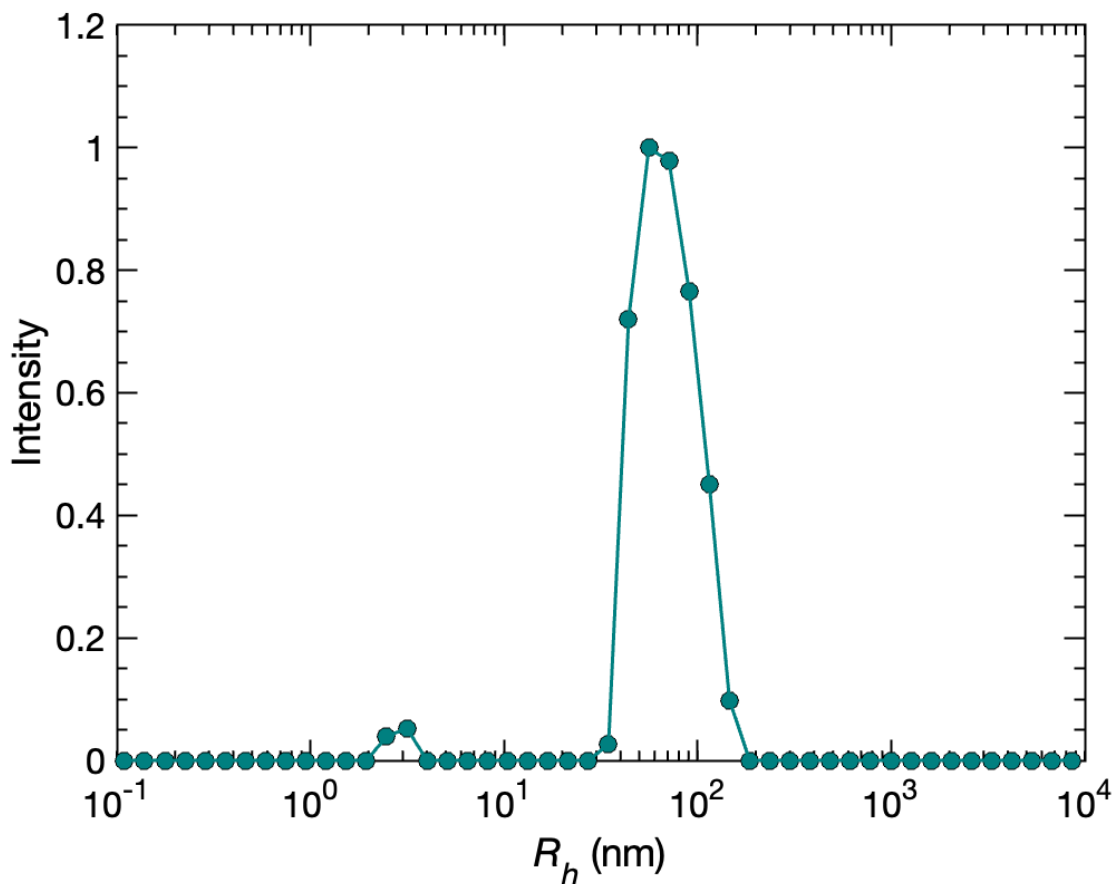

Figure S24. PEG 0 DLS  $R_h$  distribution

#### S14. Eqn. 10 derivation

The fraction of PA bound to the PGMA-PHPMA nanoparticles was estimated using the two-state model

$$D_{DOSY} = p_{agg}D_{agg} + (1 - p_{agg})D_{PA,DOSY} \quad (S5)$$

In this model, the observed PA diffusion coefficient  $D_{DOSY}$  is assumed to be a weighted average of the fraction of drug bound to a PEG aggregate and the fraction that is freely dissolved.  $D_{agg}$  is the diffusion coefficient of the polymer-drug aggregate,  $p_{agg}$  is the mole fraction of drug bound to the aggregate, and  $D_{PA,DOSY}$  is the diffusion coefficient of freely dissolved drug.<sup>S2</sup> Eqn. S5 may be rearranged to solve explicitly for  $p_{agg}$ , as depicted in Eqn. 10 in the main manuscript.

### S15. Estimated hydrodynamic radii and diffusing species

Tables S10 – S12 depict the <sup>1</sup>H NMR DOSY estimated  $R_h$  and diffusing species for the PEG and PEG-PHPMA solutions. For the PA signal (Peak G) detected in the PEG 10, PEG 16 D<sub>2</sub>O Rich, PEG 20 D<sub>2</sub>O Rich, and PEG-PHPMA samples, an  $R_h$  table is not provided because the observed diffusion coefficient reflects both the drug freely dissolved and the drug bound to aggregates.

**Table S10.** <sup>1</sup>H NMR DOSY estimated  $R_h$  and diffusing species for PEG Solutions polymer echo decays (Peak B and B')

| Sample                       | $R_{h,1}$<br>[nm] | $R_{h,1}$<br>Diffusing Species | $R_{h,2}$<br>[nm] | $R_{h,2}$<br>Diffusing Species |
|------------------------------|-------------------|--------------------------------|-------------------|--------------------------------|
| PEG 0                        | 3.0 ± 0.1         | Unimers                        | > 2000            | Aggregates                     |
| PEG 10                       | 3.0 ± 0.1         | Unimers                        | 7.0 ± 0.2         | Aggregates                     |
| PEG 16 D <sub>2</sub> O Rich | 3.1 ± 0.1         | Unimers                        | 100 ± 100         | Aggregates                     |
| PEG 16 D <sub>2</sub> O Poor | 3.5 ± 0.1         | Unimers                        | 151 ± 4           | Aggregates                     |
| PEG 20 D <sub>2</sub> O Rich | 2.9 ± 0.1         | Unimers                        | > 2000            | Aggregates                     |
| PEG 20 D <sub>2</sub> O Poor | 3.1 ± 0.1         | Unimers                        | 158 ± 5           | Aggregates                     |

**Table S11.** <sup>1</sup>H NMR DOSY estimated  $R_h$  and diffusing species for PEG solutions drug echo decays (Peak G')

| Sample                       | $R_{h,1}$<br>[nm] | $R_{h,1}$<br>Diffusing Species | $R_{h,2}$<br>[nm] | $R_{h,2}$<br>Diffusing Species |
|------------------------------|-------------------|--------------------------------|-------------------|--------------------------------|
| PEG 16 D <sub>2</sub> O Poor | 0.9 ± 0.1         | Drug interior to aggregates    | 16 ± 1            | Drug exterior to aggregates    |
| PEG 20 D <sub>2</sub> O Poor | 0.9 ± 0.1         | Drug interior to aggregates    | 16 ± 1            | Drug exterior to aggregate     |

**Table S12.** <sup>1</sup>H NMR DOSY estimated  $R_h$  and diffusing species for PEG-PHPMA PISA solutions polymer echo decays (Peak B)

| Sample       | $R_{h,1}$<br>[nm] | $R_{h,1}$<br>Diffusing Species       | $R_{h,2}$<br>[nm] | $R_{h,2}$<br>Diffusing Species |
|--------------|-------------------|--------------------------------------|-------------------|--------------------------------|
| PEG-PHPMA 0  | 7.3 ± 0.4         | Micelles and unimers, and aggregates | 200 ± 100         | Aggregates                     |
| PEG-PHPMA 10 | 6.4 ± 0.3         | Micelles, unimers, and aggregates    | 200 ± 200         | Aggregates                     |
| PEG-PHPMA 16 | 6.1 ± 0.5         | Micelles, unimers, and aggregates    | > 2000            | Aggregates                     |
| PEG-PHPMA 20 | 5.3 ± 0.9         | Micelles, unimers, and aggregates    | > 2000            | Aggregates                     |

### S16. Transmission electron microscopy particle size distributions

Figure S25 depicts the particle size distributions obtained from transmission electron microscopy.

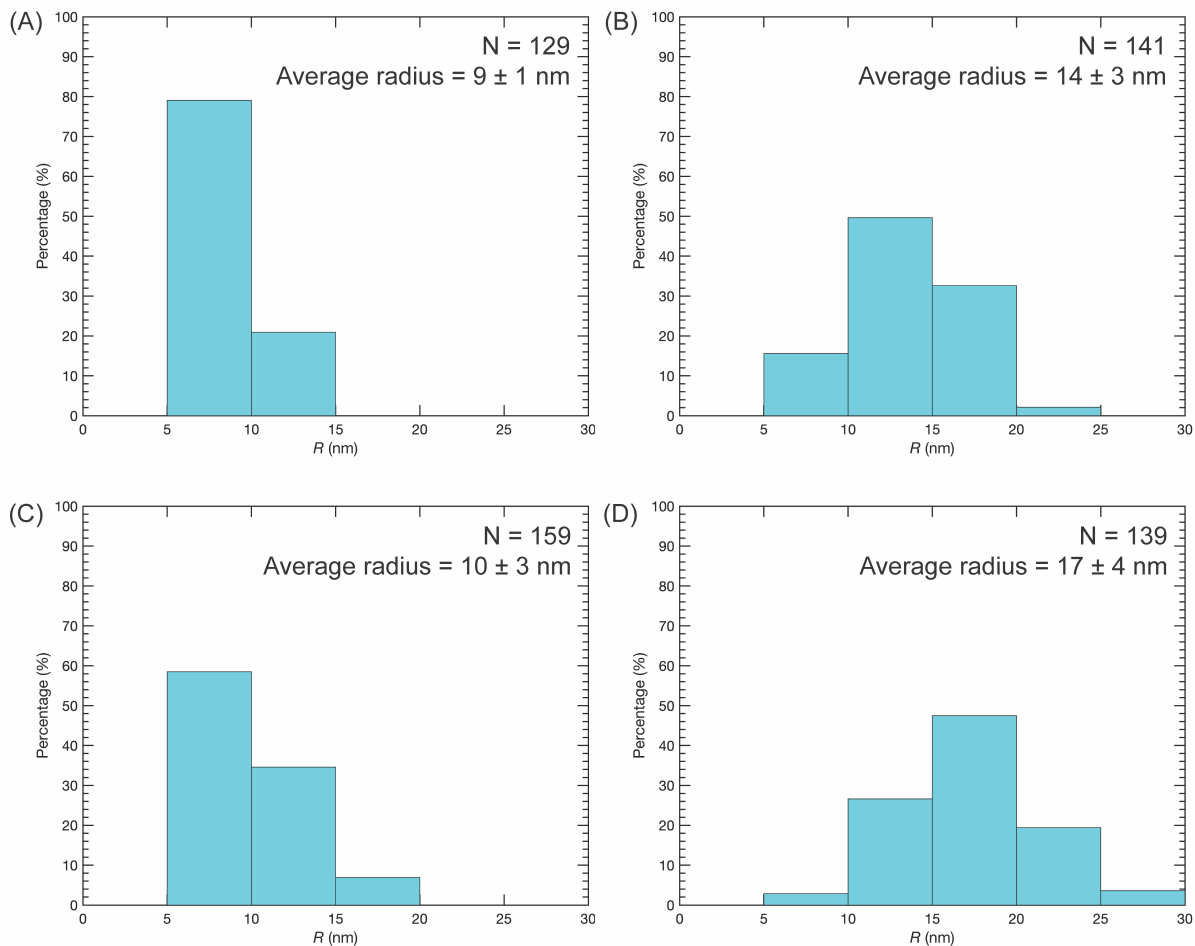

**Figure S25.** Transmission electron microscopy particle size distributions for (A) PEG-PHPMA 0, (B) PEG-PHPMA 10, (C) PEG-PHPMA 16, and (D) PEG-PHPMA 20.  $N$  refers to the total number of particles represented in the distribution

## S17. References

<sup>S1</sup>S. Perrier, *Macromolecules*, 2017, **50**, 7433–7447.

<sup>S2</sup>G. Li, D. C. Barzycki, and R. G. Ricarte, *AIChE J.*, 2023, **69**, e18014.
